# Supplementary material
Source: PubMed Central journal article supplement (PMC4308557)
Supplement: NIHMS649312-supplement-1.pdf [file NIHMS649312-supplement-1.pdf]

(A) Correlation coefficients

|                | H_mono_DM   | H_mono_6h   | H_mono_24h  | H_co_DM    |
|----------------|-------------|-------------|-------------|------------|
| Day_1_DM       | 0.087904197 | 0.070739776 | 0.069954453 | 0.06677605 |
| Day_1_Dose_10  | 0.078109962 | 0.060677544 | 0.064224337 | 0.0566813  |
| Day_1_Dose_20  | 0.076089677 | 0.059660483 | 0.065722216 | 0.05635676 |
| Day_1_Dose_40  | 0.091341527 | 0.075107882 | 0.07762809  | 0.07211229 |
| Day_1_Dose_80  | 0.092780186 | 0.076306773 | 0.076137279 | 0.07439209 |
| Day_7_DM       | 0.097427114 | 0.080481521 | 0.081129593 | 0.0745318  |
| Day_7_Dose_10  | 0.091975049 | 0.074527239 | 0.07635577  | 0.06903873 |
| Day_7_Dose_20  | 0.081359143 | 0.06287197  | 0.06794031  | 0.05754965 |
| Day_7_Dose_40  | 0.085835198 | 0.068600473 | 0.072001767 | 0.06258229 |
| Day_7_Dose_80  | 0.08127288  | 0.06441675  | 0.068739052 | 0.05898947 |
| Day_28_DM      | 0.099139384 | 0.081522918 | 0.079742533 | 0.079577   |
| Day_28_Dose_10 | 0.089583478 | 0.071993659 | 0.071401701 | 0.06942776 |
| Day_28_Dose_20 | 0.089268604 | 0.07122152  | 0.071626261 | 0.06924311 |
| Day_28_Dose_40 | 0.09662799  | 0.079376694 | 0.079100702 | 0.0753618  |
| Day_28_Dose_80 | 0.087131707 | 0.068544693 | 0.070033224 | 0.06633641 |
| Day_56_DM      | 0.105819247 | 0.088717145 | 0.083704979 | 0.08476265 |
| Day_56_Dose_10 | 0.093547596 | 0.075985798 | 0.072974688 | 0.07306001 |
| Day_56_Dose_20 | 0.101975714 | 0.085881042 | 0.082414446 | 0.08295246 |
| Day_56_Dose_40 | 0.096713769 | 0.07995317  | 0.077028244 | 0.07723037 |
| Day_56_Dose_80 | 0.086322433 | 0.069619532 | 0.068495278 | 0.0653804  |

(B) Number of matched genes between human and mouse genomes used for correlation analysis

|                | H_mono_DM | H_mono_6h | H_mono_24h | H_co_DM |
|----------------|-----------|-----------|------------|---------|
| Day_1_DM       | 13602     | 14040     | 13025      | 13219   |
| Day_1_Dose_10  | 13475     | 13890     | 12914      | 13112   |
| Day_1_Dose_20  | 13559     | 13990     | 12990      | 13183   |
| Day_1_Dose_40  | 13600     | 14037     | 13023      | 13216   |
| Day_1_Dose_80  | 13603     | 14043     | 13026      | 13220   |
| Day_7_DM       | 13597     | 14036     | 13021      | 13216   |
| Day_7_Dose_10  | 13573     | 14010     | 12999      | 13199   |
| Day_7_Dose_20  | 13601     | 14039     | 13024      | 13218   |
| Day_7_Dose_40  | 13595     | 14035     | 13020      | 13214   |
| Day_7_Dose_80  | 13603     | 14043     | 13026      | 13220   |
| Day_28_DM      | 13585     | 14019     | 13013      | 13205   |
| Day_28_Dose_10 | 13603     | 14042     | 13026      | 13220   |
| Day_28_Dose_20 | 13598     | 14037     | 13021      | 13215   |
| Day_28_Dose_40 | 13581     | 14014     | 13008      | 13202   |
| Day_28_Dose_80 | 13450     | 13849     | 12893      | 13084   |
| Day_56_DM      | 13584     | 14021     | 13010      | 13207   |
| Day_56_Dose_10 | 13535     | 13962     | 12972      | 13169   |
| Day_56_Dose_20 | 13602     | 14042     | 13025      | 13219   |
| Day_56_Dose_40 | 13603     | 14043     | 13026      | 13220   |
| Day_56_Dose_80 | 13414     | 13814     | 12861      | 13065   |

(C) Correlations significant by statistical testing (red)

|                | H_mono_DM | H_mono_6h | H_mono_24h | H_co_DM  |
|----------------|-----------|-----------|------------|----------|
| Day_1_DM       | 0         | 0         | 1.33E-15   | 2.29E-08 |
| Day_1_Dose_10  | 0         | 8.24E-13  | 2.77E-13   | 8.98E-10 |
| Day_1_Dose_20  | 0         | 1.64E-12  | 6.48E-14   | 2.09E-06 |
| Day_1_Dose_40  | 0         | 0         | 0          | 2.92E-07 |
| Day_1_Dose_80  | 0         | 0         | 0          | 1.14E-06 |
| Day_7_DM       | 0         | 0         | 0          | 2.60E-07 |
| Day_7_Dose_10  | 0         | 0         | 0          | 1.96E-07 |
| Day_7_Dose_20  | 0         | 8.90E-14  | 8.44E-15   | 1.31E-08 |
| Day_7_Dose_40  | 0         | 4.44E-16  | 2.22E-16   | 7.84E-10 |
| Day_7_Dose_80  | 0         | 2.15E-14  | 4.00E-15   | 3.73E-08 |
| Day_28_DM      | 0         | 0         | 0          | 4.52E-06 |
| Day_28_Dose_10 | 0         | 0         | 4.44E-16   | 2.23E-07 |
| Day_28_Dose_20 | 0         | 0         | 2.22E-16   | 5.19E-07 |
| Day_28_Dose_40 | 0         | 0         | 0          | 1.25E-06 |
| Day_28_Dose_80 | 0         | 6.66E-16  | 1.78E-15   | 3.38E-06 |
| Day_56_DM      | 0         | 0         | 0          | 1.01E-06 |
| Day_56_Dose_10 | 0         | 0         | 0          | 3.78E-07 |
| Day_56_Dose_20 | 0         | 0         | 0          | 7.67E-06 |
| Day_56_Dose_40 | 0         | 0         | 0          | 2.37E-07 |
| Day_56_Dose_80 | 0         | 2.22E-16  | 7.55E-15   | 8.55E-08 |

(D) Correlations significant by multiple hypothesis testing (blue)

|                | H_mono_DM | H_mono_6h | H_mono_24h | H_co_DM    |
|----------------|-----------|-----------|------------|------------|
| Day_1_DM       | 0         | 0         | 2.10E-13   | 3.05E-06   |
| Day_1_Dose_10  | 0         | 1.20E-10  | 4.07E-11   | 1.24E-07   |
| Day_1_Dose_20  | 0         | 2.36E-10  | 9.66E-12   | 0.00022935 |
| Day_1_Dose_40  | 0         | 0         | 0          | 3.59E-05   |
| Day_1_Dose_80  | 0         | 0         | 0          | 0.00013075 |
| Day_7_DM       | 0         | 0         | 0          | 3.25E-05   |
| Day_7_Dose_10  | 0         | 0         | 0          | 2.52E-05   |
| Day_7_Dose_20  | 0         | 1.32E-11  | 1.28E-12   | 1.75E-06   |
| Day_7_Dose_40  | 0         | 7.19E-14  | 3.66E-14   | 1.09E-07   |
| Day_7_Dose_80  | 0         | 3.25E-12  | 6.20E-13   | 4.93E-06   |
| Day_28_DM      | 0         | 0         | 0          | 0.00048343 |
| Day_28_Dose_10 | 0         | 0         | 7.19E-14   | 2.85E-05   |
| Day_28_Dose_20 | 0         | 0         | 3.66E-14   | 6.13E-05   |
| Day_28_Dose_40 | 0         | 0         | 0          | 0.00014088 |
| Day_28_Dose_80 | 0         | 1.07E-13  | 2.79E-13   | 0.00036828 |
| Day_56_DM      | 0         | 0         | 0          | 0.00011661 |
| Day_56_Dose_10 | 0         | 0         | 0          | 4.58E-05   |
| Day_56_Dose_20 | 0         | 0         | 0          | 0.00081348 |
| Day_56_Dose_40 | 0         | 0         | 0          | 3.01E-05   |
| Day_56_Dose_80 | 0         | 3.66E-14  | 1.16E-12   | 1.12E-05   |

| H_co_6h     | H_co_24h    | S_mono_DM    | S_mono_6h    | S_mono_24h   | S_co_DM   | S_co_6h   |
|-------------|-------------|--------------|--------------|--------------|-----------|-----------|
| 0.089826363 | 0.025901913 | -0.048580486 | -0.020954151 | -0.014134671 | -0.044399 | 0.0136596 |
| 0.0812584   | 0.017948787 | -0.053470924 | -0.030290179 | -0.0230521   | -0.051736 | 0.0063674 |
| 0.079405235 | 0.019104781 | -0.041312866 | -0.023264578 | -0.015853398 | -0.043435 | 0.0114513 |
| 0.093692583 | 0.028133354 | -0.044592177 | -0.023716728 | -0.01456726  | -0.043177 | 0.0103972 |
| 0.095990686 | 0.027243667 | -0.042308838 | -0.023980578 | -0.015029038 | -0.041942 | 0.0125185 |
| 0.097006112 | 0.027713738 | -0.044782142 | -0.012898772 | -0.007807084 | -0.038804 | 0.0227491 |
| 0.090872078 | 0.025491069 | -0.045273096 | -0.01605625  | -0.012548844 | -0.040891 | 0.021473  |
| 0.082927421 | 0.019291611 | -0.049425122 | -0.025010041 | -0.022337323 | -0.0503   | 0.0177148 |
| 0.08822163  | 0.024069266 | -0.053451009 | -0.025786123 | -0.022886865 | -0.051796 | 0.0176558 |
| 0.084047148 | 0.023807146 | -0.047839468 | -0.025986729 | -0.024215489 | -0.050443 | 0.0167631 |
| 0.099437784 | 0.037693211 | -0.039896395 | -0.012591131 | -0.003863747 | -0.035926 | 0.0195695 |
| 0.090607676 | 0.029906764 | -0.045028801 | -0.019990634 | -0.013149532 | -0.04299  | 0.0139962 |
| 0.090377697 | 0.029355653 | -0.043643839 | -0.020837143 | -0.01249714  | -0.042336 | 0.0125989 |
| 0.097885929 | 0.035229183 | -0.042178997 | -0.016645046 | -0.009858269 | -0.040517 | 0.0193379 |
| 0.087897831 | 0.02676731  | -0.040607211 | -0.018543601 | -0.01107506  | -0.040885 | 0.017463  |
| 0.104610646 | 0.035692426 | -0.04254076  | -0.009886116 | -0.001227899 | -0.034392 | 0.0204588 |
| 0.089976125 | 0.024044212 | -0.04424674  | -0.014431586 | -0.0067202   | -0.037232 | 0.0132828 |
| 0.0974267   | 0.034232232 | -0.038902769 | -0.008926984 | -0.000538795 | -0.032515 | 0.0147697 |
| 0.094475073 | 0.028538307 | -0.044927898 | -0.013337615 | -0.00521621  | -0.037006 | 0.0157515 |
| 0.085578899 | 0.019215242 | -0.046829984 | -0.022593787 | -0.015693487 | -0.042756 | 0.01447   |

| H_co_6h | H_co_24h | S_mono_DM | S_mono_6h | S_mono_24h | S_co_DM | S_co_6h |
|---------|----------|-----------|-----------|------------|---------|---------|
| 13241   | 13494    | 14445     | 14457     | 13390      | 14149   | 13941   |
| 13128   | 13371    | 14265     | 14276     | 13266      | 13979   | 13786   |
| 13208   | 13453    | 14387     | 14399     | 13351      | 14097   | 13893   |
| 13238   | 13491    | 14441     | 14453     | 13387      | 14145   | 13938   |
| 13242   | 13495    | 14448     | 14460     | 13391      | 14150   | 13942   |
| 13239   | 13492    | 14439     | 14451     | 13387      | 14141   | 13935   |
| 13219   | 13471    | 14412     | 14423     | 13365      | 14118   | 13911   |
| 13240   | 13493    | 14444     | 14456     | 13389      | 14147   | 13939   |
| 13237   | 13489    | 14438     | 14450     | 13384      | 14139   | 13933   |
| 13242   | 13495    | 14448     | 14460     | 13391      | 14150   | 13942   |
| 13227   | 13477    | 14421     | 14434     | 13373      | 14125   | 13919   |
| 13242   | 13495    | 14447     | 14458     | 13390      | 14150   | 13942   |
| 13237   | 13489    | 14442     | 14454     | 13386      | 14144   | 13936   |
| 13224   | 13475    | 14417     | 14429     | 13370      | 14121   | 13916   |
| 13110   | 13350    | 14221     | 14228     | 13236      | 13937   | 13752   |
| 13230   | 13481    | 14424     | 14436     | 13377      | 14128   | 13922   |
| 13188   | 13432    | 14355     | 14365     | 13329      | 14065   | 13865   |
| 13241   | 13494    | 14447     | 14459     | 13390      | 14149   | 13941   |
| 13242   | 13495    | 14448     | 14460     | 13391      | 14150   | 13942   |
| 13083   | 13315    | 14178     | 14191     | 13209      | 13903   | 13711   |

| H_co_6h     | H_co_24h    | S_mono_DM | S_mono_6h | S_mono_24h | S_co_DM     | S_co_6h   |           |
|-------------|-------------|-----------|-----------|------------|-------------|-----------|-----------|
| 0.015899181 | 0.100617924 | 8.88E-16  |           | 0          | 0.002722331 | 1.27E-07  | 0.1067983 |
| 0.00051845  | 0.007683065 | 1.25E-11  |           | 0          | 0.038707843 | 9.33E-10  | 0.4547267 |
| 0.007499378 | 0.065954339 | 1.34E-11  |           | 0          | 0.027280135 | 2.48E-07  | 0.1771202 |
| 0.006354789 | 0.090659067 | 0         |           | 0          | 0.001132202 | 2.79E-07  | 0.2196696 |
| 0.005785894 | 0.080840511 | 0         |           | 0          | 0.001616494 | 6.01E-07  | 0.1393903 |
| 0.137791588 | 0.364532561 | 0         |           | 0          | 0.001341937 | 3.92E-06  | 0.0072408 |
| 0.064893037 | 0.145282304 | 0         |           | 0          | 0.00320716  | 1.17E-06  | 0.0113191 |
| 0.004002512 | 0.009465347 | 4.46E-12  |           | 0          | 0.025598583 | 2.15E-09  | 0.0364875 |
| 0.003007578 | 0.00785519  | 5.22E-14  |           | 0          | 0.005357753 | 7.16E-10  | 0.0371573 |
| 0.002784148 | 0.004904864 | 1.28E-12  |           | 0          | 0.005867706 | 1.93E-09  | 0.0477843 |
| 0.147614217 | 0.653789251 | 0         |           | 0          | 1.30E-05    | 1.95E-05  | 0.0209544 |
| 0.021424851 | 0.126641902 | 0         |           | 0          | 0.000537938 | 3.12E-07  | 0.0984225 |
| 0.016512236 | 0.146677713 | 0         |           | 0          | 0.000681783 | 4.73E-07  | 0.1369529 |
| 0.055612551 | 0.25250423  | 0         |           | 0          | 4.61E-05    | 1.46E-06  | 0.022535  |
| 0.033736919 | 0.200701262 | 2.44E-15  |           | 0          | 0.002071525 | 1.38E-06  | 0.040576  |
| 0.255522149 | 0.886641308 | 0         |           | 0          | 3.64E-05    | 4.34E-05  | 0.0157786 |
| 0.097471295 | 0.436106942 | 0         |           | 0          | 0.00550193  | 1.00E-05  | 0.1178223 |
| 0.30435102  | 0.950098867 | 0         |           | 0          | 7.43E-05    | 0.0001096 | 0.0811883 |
| 0.124849022 | 0.544578148 | 0         |           | 0          | 0.000957237 | 1.07E-05  | 0.0629094 |
| 0.00975538  | 0.070168249 | 6.66E-15  |           | 0          | 0.027215662 | 4.58E-07  | 0.0902122 |

| H_co_6h     | H_co_24h    | S_mono_DM | S_mono_6h | S_mono_24h | S_co_DM     | S_co_6h   |           |
|-------------|-------------|-----------|-----------|------------|-------------|-----------|-----------|
|             | 1           | 1         | 1.41E-13  | 0          | 0.239565111 | 1.65E-05  | 1         |
| 0.049771176 | 0.568546809 | 1.77E-09  |           | 0          | 1           | 1.28E-07  | 1         |
| 0.562453379 |             | 1         | 1.89E-09  | 0          | 1           | 3.13E-05  | 1         |
| 0.489318724 |             | 1         | 0         | 0          | 0.104162627 | 3.46E-05  | 1         |
| 0.457085664 |             | 1         | 0         | 0          | 0.145484442 | 7.03E-05  | 1         |
|             | 1           | 1         | 0         | 0          | 0.122116237 | 0.0004229 | 0.5502982 |
|             | 1           | 1         | 0         | 0          | 0.272608565 | 0.0001336 | 0.7923362 |
| 0.336210982 | 0.681504988 | 6.38E-10  |           | 0          | 1           | 2.90E-07  | 1         |
| 0.258651677 | 0.573428844 | 7.83E-12  |           | 0          | 0.43397802  | 1.00E-07  | 1         |
| 0.242220852 | 0.402198835 | 1.86E-10  |           | 0          | 0.45768108  | 2.62E-07  | 1         |
|             | 1           | 1         | 0         | 0          | 0.001339347 | 0.0019869 | 1         |
|             | 1           | 1         | 0         | 0          | 0.051104149 | 3.81E-05  | 1         |
|             | 1           | 1         | 0         | 0          | 0.064087641 | 5.63E-05  | 1         |
|             | 1           | 1         | 0         | 0          | 0.004567395 | 0.0001624 | 1         |
|             | 1           | 1         | 3.81E-13  | 0          | 0.184365718 | 0.0001542 | 1         |
|             | 1           | 1         | 0         | 0          | 0.003678608 | 0.0043365 | 1         |
|             | 1           | 1         | 0         | 0          | 0.440154423 | 0.0010524 | 1         |
|             | 1           | 1         | 0         | 0          | 0.007284421 | 0.0106303 | 1         |
|             | 1           | 1         | 0         | 0          | 0.089023081 | 0.0011099 | 1         |
| 0.692631997 |             | 1         | 1.03E-12  | 0          | 1           | 5.49E-05  | 1         |

S\_co\_24h

-0.01681  
-0.02477  
-0.0188  
-0.01733  
-0.01636  
-0.00949  
-0.01189  
-0.01994  
-0.02028  
-0.02118  
-0.00624  
-0.01429  
-0.0149  
-0.00991  
-0.01199  
-0.00569  
-0.01341  
-0.00868  
-0.01069  
-0.01783

S\_co\_24h

13568  
13426  
13524  
13565  
13569  
13562  
13539  
13566  
13560  
13569  
13548  
13569  
13564  
13545  
13401  
13552  
13499  
13568  
13569  
13361

S\_co\_24h

0.050166

0.004106

0.028756

0.043576

0.056624

0.268885

0.166528

0.020184

0.018187

0.013621

0.467535

0.095985

0.082645

0.248899

0.165097

0.50807

0.119132

0.31224

0.213004

0.039317

S\_co\_24h

1

0.340807

1

1

1

1

1

1

1

0.939825

1

1

1

1

1

1

1

1

1

1
