# Supplementary material
Source: PubMed Central journal article supplement (PMC4308557)
Supplement: NIHMS649312-supplement-2.pdf [file NIHMS649312-supplement-2.pdf]

| in_vitro_gene_name | in_vitro_fold_change | in_vivo_gene_name | in_vivo_fold_change |
|--------------------|----------------------|-------------------|---------------------|
| SPNS3              | 2.828473817          | SPNS3             | 1.595785966         |
| SFRP1              | 2.641968201          | SFRP1             | 1.566564118         |
| EMP2               | -1.719489629         | EMP2              | -1.509073154        |
| SPDEF              | 1.741276572          | SPDEF             | 1.71382329          |
| PHEX               | -2.690290575         | PHEX              | -1.675266022        |
| UBE2T              | -2.084235144         | UBE2T             | -3.081899563        |
| VASH2              | 5.282281445          | VASH2             | 2.277472278         |
| INHBA              | 1.937467495          | INHBA             | 1.605178962         |
| ASGR2              | 1.778307599          | ASGR2             | 1.540298834         |
| SNAI1              | 4.577711823          | SNAI1             | 1.625704163         |
| DSG2               | -2.189292144         | DSG2              | -2.498692691        |
| RBM45              | 1.504953934          | RBM45             | 1.647140266         |
| CDC7               | -1.766185106         | CDC7              | -1.549683152        |
| INHBB              | 3.542253243          | INHBB             | 1.505260228         |
| MINK1              | -2.327261132         | MINK1             | -1.706095954        |
| IP6K3              | -1.743431565         | IP6K3             | -1.650972276        |
| ITM2A              | 1.576200968          | ITM2A             | 1.902775624         |
| FBXL2              | 1.577277993          | FBXL2             | 1.542615632         |
| BMP6               | 7.750881885          | BMP6              | 1.5535971           |
| MMP19              | 1.654329085          | MMP19             | 2.768344674         |
| FANCA              | -1.759048252         | FANCA             | -1.777464749        |
| EGR1               | 2.172349339          | EGR1              | 1.835836927         |
| CNR1               | -3.208050796         | CNR1              | -2.832246115        |
| CFTR               | 2.741294052          | CFTR              | 1.943807459         |
| RORA               | -2.651047586         | RORA              | -1.91978024         |
| PDXK               | -1.88175936          | PDXK              | -1.586464669        |
| EMP2               | -1.76795296          | EMP2              | -1.509073154        |
| IL33               | 1.533443252          | IL33              | 2.056951296         |
| CHST7              | -1.652593906         | CHST7             | -1.621532666        |
| INADL              | 1.633094996          | INADL             | 1.697532844         |
| DISP2              | 1.735344281          | DISP2             | 1.539361934         |
| CD33               | 2.31085778           | CD33              | 2.510273127         |
| RBBP6              | -1.567199759         | RBBP6             | -1.618363544        |
| EPOR               | -2.042097633         | EPOR              | -1.814146006        |
| CIDEB              | 2.364927205          | CIDEB             | 1.993597846         |
| MMP9               | 1.601606997          | MMP9              | 1.776021951         |
| LUZP1              | -1.708857491         | LUZP1             | -1.625792698        |
| HEYL               | 1.750775653          | HEYL              | 1.542430117         |
| BUB3               | -2.096881678         | BUB3              | -1.930611788        |
| EGR2               | 2.8664589            | EGR2              | 2.155968061         |
| PTPRR              | -1.526141026         | PTPRR             | -1.548217088        |
| RFX2               | 1.532363407          | RFX2              | 1.611711995         |
| RAMP1              | 4.803958334          | RAMP1             | 1.696335332         |
| GPSM2              | -2.107583664         | GPSM2             | -1.620099024        |
| HYAL1              | -2.645300693         | HYAL1             | -1.852124093        |
| CD47               | -1.86903585          | CD47              | -1.709914327        |

|       |              |       |              |
|-------|--------------|-------|--------------|
| NMU   | -1.556154463 | NMU   | -3.741180775 |
| LY86  | 2.410623747  | LY86  | 1.578903381  |
| TAAR2 | 2.250468647  | TAAR2 | 3.029908125  |
| WVOX  | 1.515902616  | WVOX  | 1.651610311  |
| SDPR  | -2.236146983 | SDPR  | -1.976560496 |
| IL23A | 1.645805718  | IL23A | 3.056889643  |
| CD9   | 2.471142302  | CD9   | 1.563238724  |
| SFRP2 | 1.991526324  | SFRP2 | 1.547903491  |
| UBD   | 1.569667035  | UBD   | 1.981105291  |
| IFFO1 | -1.584301113 | IFFO1 | -1.824962502 |
| PRPS2 | -2.242685322 | PRPS2 | -1.62655213  |
| APOC1 | 1.937239209  | APOC1 | 1.577311803  |
| ST7   | -1.511573739 | ST7   | -1.558205807 |
| INHBE | -1.746618085 | INHBE | -2.05524889  |
| ECE1  | -3.654707818 | ECE1  | -1.753024728 |
| ACOT1 | 1.740328192  | ACOT1 | 1.947000743  |
| PLAC8 | 1.516405076  | PLAC8 | 1.688799173  |
| LEF1  | -1.55937225  | LEF1  | -1.518287411 |
| LEF1  | -1.55937225  | LEF1  | -1.643032521 |
| PRR16 | 1.817787429  | PRR16 | 1.540563374  |
| EDNRA | 3.054745455  | EDNRA | 1.614583185  |
| LEPR  | 1.553051462  | LEPR  | 1.703007748  |
| ABCA1 | -1.705897334 | ABCA1 | -1.527939667 |
| CHST3 | -2.054916693 | CHST3 | -1.89510161  |
| IDS   | -1.608548451 | IDS   | -1.58220915  |
| UHMK1 | -1.622166697 | UHMK1 | -1.570331025 |
| RUSC1 | -1.506260727 | RUSC1 | -2.125341152 |
| HEY2  | 3.579737937  | HEY2  | 1.766096088  |
| INO80 | -1.684008879 | INO80 | -1.588478009 |
| ECE1  | -3.217157594 | ECE1  | -1.753024728 |
| CENPA | -2.83357735  | CENPA | -1.540452726 |
| FABP5 | -1.503572592 | FABP5 | -1.65823714  |
| ENC1  | 1.562745417  | ENC1  | 1.672684283  |
| FOXO3 | -1.662555229 | FOXO3 | -1.525764132 |
| ISM1  | -2.531903568 | ISM1  | -1.850479264 |
| ISM1  | -2.531903568 | ISM1  | -1.823904095 |
| NOP14 | -2.001340044 | NOP14 | -1.549064328 |
| PAG1  | -5.285178712 | PAG1  | -1.678885089 |
| GLP2R | 2.258956791  | GLP2R | 1.579959458  |
| ATF3  | 1.6272012    | ATF3  | 1.664573331  |
| EMR1  | 1.766253909  | EMR1  | 1.918319357  |
| PAG1  | -3.593197102 | PAG1  | -1.678885089 |
| SPHK1 | 1.577467101  | SPHK1 | 1.694885886  |
| FXYD3 | 1.838458654  | FXYD3 | 1.55952165   |
| RAMP1 | 4.590008294  | RAMP1 | 1.696335332  |
| SMC4  | -2.018768381 | SMC4  | -1.623316968 |
| FAIM2 | 1.590058336  | FAIM2 | 1.849599631  |

|       |              |       |              |
|-------|--------------|-------|--------------|
| PRRX1 | 2.515653923  | PRRX1 | 2.494737897  |
| FOXS1 | 2.665330321  | FOXS1 | 1.82282232   |
| FANCA | -1.684688112 | FANCA | -1.777464749 |
| ASPM  | -3.071403274 | ASPM  | -1.594738224 |
| PAQR3 | -1.502980769 | PAQR3 | -1.954959832 |
| GFRA1 | 1.843256357  | GFRA1 | 1.597827432  |
| PDE7A | -1.768602581 | PDE7A | -1.62746013  |
| RAP2B | 1.842823307  | RAP2B | 1.656595403  |
| RARB  | -1.526939219 | RARB  | -1.526466345 |
| NPL   | 2.5099063    | NPL   | 1.876375546  |
| LCORL | -1.733432042 | LCORL | -1.922746923 |
| PPTC7 | -2.142553902 | PPTC7 | -1.793604629 |
| LYPD6 | -1.909168002 | LYPD6 | -1.586227165 |
| JPH1  | -1.693094542 | JPH1  | -1.523205396 |
| BBX   | -1.548993652 | BBX   | -1.516103167 |
| UNC5A | 1.632993501  | UNC5A | 1.615541703  |
| PDE4D | -6.935953502 | PDE4D | -1.594853213 |
| PDE4D | -3.198081713 | PDE4D | -1.594853213 |
| PRR11 | -2.28666905  | PRR11 | -1.885977691 |
| AQP4  | 4.730864952  | AQP4  | 1.829027843  |
| DGKG  | -1.723573786 | DGKG  | -1.705068843 |
| DGKG  | -1.723573786 | DGKG  | -1.68476118  |
| ABCA1 | -1.636357723 | ABCA1 | -1.527939667 |
| GFRA1 | 1.626958737  | GFRA1 | 1.597827432  |
| SMC4  | -2.130157155 | SMC4  | -1.623316968 |

| in_vitro_gene_name | in_vitro_fold_change | in_vivo_gene_name | in_vivo_fold_change |
|--------------------|----------------------|-------------------|---------------------|
| SFRP1              | 2.961272834          | SFRP1             | 2.781915666         |
| LCK                | -1.627291305         | LCK               | -1.959418273        |
| FAM5C              | -1.585815001         | FAM5C             | -2.338984964        |
| FOS                | 1.720205399          | FOS               | 1.898177112         |
| EMP2               | -2.261914377         | EMP2              | -1.509073154        |
| TRAM1              | 1.872955719          | TRAM1             | 1.698058025         |
| PHEX               | -3.578543118         | PHEX              | -1.675266022        |
| UBE2T              | -2.766992025         | UBE2T             | -3.081899563        |
| VASH2              | 2.096804478          | VASH2             | 2.277472278         |
| INHBA              | 3.231971983          | INHBA             | 1.605178962         |
| SNAI1              | 2.835330132          | SNAI1             | 1.625704163         |
| RDM1               | -1.774728327         | RDM1              | -1.654044334        |
| RBM45              | 1.571915415          | RBM45             | 1.647140266         |
| ESM1               | -1.963365663         | ESM1              | -1.703473635        |
| DDC                | -1.533002075         | DDC               | -1.515535719        |
| CDC7               | -2.040502349         | CDC7              | -1.549683152        |
| INHBB              | 3.735456243          | INHBB             | 1.505260228         |
| RNF6               | 1.542060243          | RNF6              | 1.500393123         |
| ABCG1              | 1.775732502          | ABCG1             | 1.629416051         |
| RTP4               | 1.917366146          | RTP4              | 1.642442364         |
| ITM2A              | 2.33287475           | ITM2A             | 1.902775624         |
| FBXL2              | 1.796765213          | FBXL2             | 1.542615632         |
| ARSI               | 1.642849596          | ARSI              | 1.782612752         |
| BMP6               | 4.4856817            | BMP6              | 1.5535971           |
| ACER3              | 2.460297736          | ACER3             | 1.5025331           |
| FANCA              | -1.841494938         | FANCA             | -1.777464749        |
| XYLB               | 1.750962657          | XYLB              | 1.515514798         |
| EGR1               | 3.762378924          | EGR1              | 1.835836927         |
| CNR1               | -2.801238592         | CNR1              | -2.832246115        |
| CFTR               | 2.476797972          | CFTR              | 1.943807459         |
| ACSL4              | 1.52043768           | ACSL4             | 1.754765001         |
| IFI44              | 2.262194016          | IFI44             | 1.706939398         |
| CDK4               | 1.510177528          | CDK4              | 1.542091926         |
| DAPP1              | -1.522991213         | DAPP1             | -1.577937443        |
| RORA               | -1.939242288         | RORA              | -1.608809355        |
| SOX9               | 1.564094326          | SOX9              | 1.6520774           |
| SOX9               | 1.564094326          | SOX9              | 1.744629688         |
| PDXK               | -1.861496468         | PDXK              | -1.586464669        |
| EMP2               | -2.213603853         | EMP2              | -1.509073154        |
| CD6                | -1.50480996          | CD6               | -1.609571826        |
| RAB8B              | 1.754733223          | RAB8B             | 1.518082187         |
| INADL              | 1.567548826          | INADL             | 1.697532844         |
| MYRIP              | 1.687730442          | MYRIP             | 2.431446117         |
| CD33               | 2.927705965          | CD33              | 2.510273127         |
| SYN1               | -1.541078518         | SYN1              | -1.82721916         |
| DNER               | -1.625407182         | DNER              | -1.751533807        |

|       |              |            |              |
|-------|--------------|------------|--------------|
| EPOR  | -2.244643882 | EPOR       | -1.814146006 |
| LSM11 | 1.539779478  | LSM11      | 1.518576481  |
| CIDEB | 1.632715244  | CIDEB      | 1.993597846  |
| DHX58 | 1.900566904  | DHX58      | 1.578577082  |
| HAS3  | 3.18211982   | HAS3       | 1.95499572   |
| VAT1L | -1.64077515  | VAT1L      | -2.237854688 |
| HEYL  | 2.457666076  | HEYL       | 1.64052527   |
| HEMGN | -1.66805993  | HEMGN      | -2.409888041 |
| VLDLR | -1.617183987 | VLDLR      | -1.598041215 |
| PLLP  | -1.670168837 | PLLP       | -1.627058959 |
| CYR61 | 1.991825628  | CYR61      | 1.530513453  |
| BUB3  | -2.345410273 | BUB3       | -1.930611788 |
| EGR2  | 5.425752209  | EGR2       | 2.155968061  |
| TUB   | 1.793555482  | TUB        | 2.703974464  |
| RFX2  | 1.548365061  | RFX2       | 1.611711995  |
| RAMP1 | 5.0631407    | RAMP1      | 1.696335332  |
| ASPM  | -3.064675688 | ASPM       | -1.594738224 |
| IFIT1 | 1.998294749  | MOUSE16989 | 1.61697818   |
| IFIT1 | 1.998294749  | IFIT1      | 1.61697818   |
| IL16  | -1.558847628 | IL16       | -1.642342533 |
| GPSM2 | -2.408526059 | GPSM2      | -1.620099024 |
| HYAL1 | -4.467324306 | HYAL1      | -1.867785661 |
| CD47  | -1.695574775 | CD47       | -1.709914327 |
| NMU   | -2.027873567 | NMU        | -3.741180775 |
| CD9   | 2.278634093  | CD9        | 1.563238724  |
| RYR1  | -1.592635881 | RYR1       | -1.791105347 |
| SFRP2 | 3.470528337  | SFRP2      | 1.547903491  |
| UBD   | 1.626335649  | UBD        | 1.981105291  |
| ISG15 | 2.229099287  | ISG15      | 2.013779916  |
| STAR  | -1.608053414 | STAR       | -1.908258719 |
| CYTIP | -1.514296778 | CYTIP      | -1.579403037 |
| KCNK3 | 1.538416629  | KCNK3      | 1.533234061  |
| DBC1  | 1.812965463  | DBC1       | 1.773325089  |
| PRPS2 | -1.811203689 | PRPS2      | -1.62655213  |
| AP1S3 | 2.312395262  | AP1S3      | 1.716599689  |
| RSPO3 | -1.528357004 | RSPO3      | -1.85780164  |
| APOC1 | 2.461524822  | APOC1      | 1.577311803  |
| PGM5  | -1.523767717 | PGM5       | -2.805685456 |
| HBEGF | 3.198667422  | HBEGF      | 2.094351995  |
| INHBE | -1.669129156 | INHBE      | -2.05524889  |
| ECE1  | -2.861600216 | ECE1       | -1.753024728 |
| IL1R1 | 2.830519722  | IL1R1      | 1.607955721  |
| IL2RB | -1.523314339 | IL2RB      | -1.659131804 |
| PRR16 | 1.624851577  | PRR16      | 1.540563374  |
| IL5   | 1.62077315   | IL5        | 2.626369659  |
| EDNRA | 5.727431993  | EDNRA      | 1.614583185  |
| CEBPA | 1.668578593  | CEBPA      | 1.640333318  |

|       |              |       |              |
|-------|--------------|-------|--------------|
| LEPR  | 2.949012041  | LEPR  | 1.703007748  |
| PDK4  | 2.509529292  | PDK4  | 2.991829217  |
| SPRY4 | 3.213575375  | SPRY4 | 1.527564384  |
| RSAD2 | 2.441798443  | RSAD2 | 2.0325857    |
| RSAD2 | 2.441798443  | RSAD2 | 1.57299544   |
| UCP3  | -1.651732889 | UCP3  | -2.327470151 |
| CBLN1 | -1.595327867 | CBLN1 | -1.861209609 |
| KCNB1 | 2.030776759  | KCNB1 | 1.797075042  |
| SNX16 | 2.204402461  | SNX16 | 1.554061159  |
| LYPD5 | 5.484029741  | LYPD5 | 1.690279017  |
| THAP2 | 3.043615343  | THAP2 | 1.501630542  |
| HEY2  | 2.537028413  | HEY2  | 1.766096088  |
| EVX1  | -1.606649883 | EVX1  | -1.666871662 |
| ECE1  | -2.313670683 | ECE1  | -1.753024728 |
| CENPA | -3.972416676 | CENPA | -1.540452726 |
| COTL1 | 1.70719778   | COTL1 | 1.680756199  |
| LYPD3 | -1.817472493 | LYPD3 | -2.426041231 |
| ENC1  | 4.603963002  | ENC1  | 2.388064882  |
| FBXL7 | -1.658538639 | FBXL7 | -1.762334748 |
| RHOJ  | -1.523365524 | RHOJ  | -1.634872201 |
| MYCN  | -1.624524519 | MYCN  | -1.657662241 |
| FOXO3 | -1.533932431 | FOXO3 | -1.525764132 |
| FANCM | -1.623967987 | FANCM | -1.760297921 |
| KIF5C | 1.645588078  | KIF5C | 1.505388365  |
| ZMAT4 | -1.829269735 | ZMAT4 | -2.573265363 |
| FABP5 | -1.67214823  | FABP5 | -1.65823714  |
| TDRD9 | -1.686155178 | TDRD9 | -2.205510044 |
| ACACA | -1.650715026 | ACACA | -1.697305817 |
| RRP15 | 1.667133719  | RRP15 | 1.513895062  |
| NOP14 | -1.651020334 | NOP14 | -1.549064328 |
| KANK4 | -1.637605899 | KANK4 | -1.517512929 |
| LYZL2 | 1.676274633  | LYZL1 | 1.817070873  |
| ING5  | 1.5980965    | ING5  | 1.607819595  |
| GLP2R | 2.104613206  | GLP2R | 1.579959458  |
| FANCI | -2.383228078 | FANCI | -1.606601032 |
| ATF3  | 1.563881693  | ATF3  | 1.664573331  |
| EMR1  | 1.732853246  | EMR1  | 1.918319357  |
| NEK6  | 1.785562163  | NEK6  | 1.563902056  |
| PAG1  | -1.577805662 | PAG1  | -1.678885089 |
| MED13 | 1.545505392  | MED13 | 2.002612373  |
| CD7   | 1.501010757  | CD7   | 1.805431779  |
| TCEA2 | -1.734214039 | TCEA2 | -1.733031672 |
| RAMP1 | 4.211675866  | RAMP1 | 1.696335332  |
| UNG   | 1.733706312  | UNG   | 1.856699756  |
| SMC4  | -1.657393202 | SMC4  | -1.623316968 |
| RSPO4 | -1.675363174 | RSPO4 | -1.557864121 |
| NTRK3 | 1.690917244  | NTRK3 | 1.633727528  |

|       |              |       |              |
|-------|--------------|-------|--------------|
| LUZP1 | -1.560869347 | LUZP1 | -1.625792698 |
| LRRC4 | 1.715137957  | LRRC4 | 1.512808136  |
| PRRX1 | 2.977679825  | PRRX1 | 2.494737897  |
| AP1S3 | 1.598814005  | AP1S3 | 1.716599689  |
| VLDLR | -1.907744917 | VLDLR | -1.598041215 |
| FANCA | -2.475410726 | FANCA | -1.777464749 |
| ASPM  | -3.540446562 | ASPM  | -1.594738224 |
| AAK1  | -1.773786503 | AAK1  | -1.578763643 |
| PAQR3 | -1.538479896 | PAQR3 | -1.954959832 |
| MYLK3 | -1.890200816 | MYLK3 | -1.696496283 |
| RAP2B | 2.227980685  | RAP2B | 1.656595403  |
| RARB  | -1.752150534 | RARB  | -1.526466345 |
| OPHN1 | 2.723433589  | OPHN1 | 1.846160513  |
| UQCC  | -1.533670995 | UQCC  | -1.731414554 |
| NPL   | 1.949662987  | NPL   | 1.876375546  |
| LCORL | -1.999592287 | LCORL | -1.922746923 |
| ANKK1 | 1.550209563  | ANKK1 | 1.528488501  |
| P2RY1 | -1.828226589 | P2RY1 | -1.532606505 |
| PPTC7 | -2.523773956 | PPTC7 | -1.793604629 |
| PADI1 | -2.278521604 | PADI1 | -1.533696841 |
| LYPD6 | -1.899324714 | LYPD6 | -1.586227165 |
| IL16  | -1.87291722  | IL16  | -1.642342533 |
| BLNK  | -1.630204045 | BLNK  | -1.725509119 |
| CD3D  | -2.418311867 | CD3D  | -1.604814092 |
| THSD4 | 2.938607045  | THSD4 | 1.607377364  |
| FANCA | -2.095930562 | FANCA | -1.777464749 |
| PDE4D | -5.349800455 | PDE4D | -1.594853213 |
| PDE4D | -5.426610019 | PDE4D | -1.594853213 |
| PKP1  | -1.844816862 | PKP1  | -3.302924443 |
| SYNPO | -1.795148392 | SYNPO | -1.756779687 |
| NXNL2 | 1.693864415  | NXNL2 | 1.868100357  |
| PRR11 | -3.839826381 | PRR11 | -1.885977691 |
| NPL   | 2.327471596  | NPL   | 1.876375546  |
| CPLX2 | -1.600335396 | CPLX2 | -1.793442471 |
| EIF3C | -1.502253567 | EIF3C | -2.042301827 |
| ABCA1 | -2.304853085 | ABCA1 | -1.527939667 |
| SMC4  | -1.965844208 | SMC4  | -1.623316968 |
| CAP2  | 2.688806425  | CAP2  | 2.368923044  |

| in_vitro_gene_name | in_vitro_fold_change | in_vivo_gene_name | in_vivo_fold_change |
|--------------------|----------------------|-------------------|---------------------|
| MARCO              | 2.280466783          | MARCO             | 1.868722943         |
| MSH2               | -2.249796401         | MSH2              | -1.507881606        |
| SMOX               | 1.696174694          | SMOX              | 1.628057863         |
| IL18               | -1.670402551         | IL18              | -1.640539494        |
| CHPT1              | -2.80685249          | CHPT1             | -1.658123635        |
| FUS                | -1.798369728         | FUS               | -1.866560037        |
| CD79A              | 1.669342993          | CD79A             | 1.777089029         |
| RBM39              | -1.656485112         | RBM39             | -1.629745828        |
| FOXF2              | -1.536544184         | FOXF2             | -1.636724309        |
| PHEX               | -2.166024464         | PHEX              | -1.675266022        |
| UBE2T              | -2.14107494          | UBE2T             | -3.081899563        |
| VASH2              | 1.584596281          | VASH2             | 2.277472278         |
| CCAR1              | -1.581028538         | CCAR1             | -1.642706235        |
| PTX3               | -2.532173104         | PTX3              | -1.653699802        |
| INHBA              | 1.623042071          | INHBA             | 1.605178962         |
| PALB2              | -1.969038676         | PALB2             | -1.682915373        |
| TCEA1              | -1.548136241         | TCEA1             | -1.603393991        |
| TRAK1              | -1.555656609         | TRAK1             | -1.599353711        |
| TRH                | 1.593260301          | TRH               | 1.542862299         |
| CAV1               | -2.386803905         | CAV1              | -1.864272915        |
| CLIC4              | -3.224565312         | CLIC4             | -1.507639144        |
| CKAP5              | -1.772628699         | CKAP5             | -2.628157139        |
| CKAP5              | -1.772628699         | CKAP5             | -1.861280873        |
| ADCY5              | -1.520919657         | ADCY5             | -1.777325962        |
| TBX3               | -1.782217473         | TBX3              | -1.51652441         |
| ZMIZ1              | -1.517791534         | ZMIZ1             | -1.672022993        |
| SMC3               | -2.465290929         | SMC3              | -1.904091694        |
| NRIP2              | -2.025723753         | NRIP2             | -1.685940617        |
| ADAT1              | -6.006443895         | ADAT1             | -1.520807919        |
| RDM1               | -1.73547344          | RDM1              | -1.654044334        |
| DSG2               | -2.009370815         | DSG2              | -2.498692691        |
| FOXA3              | 1.534344559          | FOXA3             | 4.859924643         |
| ZEB2               | -2.206008015         | ZEB2              | -1.851688276        |
| RND3               | -1.756898492         | RND3              | -1.560760051        |
| RBM45              | 1.565624218          | RBM45             | 1.647140266         |
| WWP1               | -1.663871732         | WWP1              | -1.878250655        |
| PLAC1              | -1.893585663         | PLAC1             | -2.417445918        |
| CDC7               | -1.889891825         | CDC7              | -1.549683152        |
| LIMA1              | -1.961824408         | LIMA1             | -1.688978239        |
| UBR1               | -2.726516735         | UBR1              | -1.697106095        |
| INHBB              | 2.053189745          | INHBB             | 1.505260228         |
| GRB14              | -2.066097334         | GRB14             | -3.936827786        |
| WDR60              | -2.966319053         | WDR60             | -1.921056445        |
| BCOR               | -1.75251816          | BCOR              | -1.570821577        |
| BEX1               | -1.772313639         | BEX1              | -1.830838376        |
| BEX1               | -1.772313639         | BEX2              | -1.830838376        |



|       |                    |              |
|-------|--------------------|--------------|
| KLK1  | 2.312395673 K1KB3  | 1.877494312  |
| KLK1  | 2.312395673 KLK1   | 1.877494312  |
| NID2  | -1.790604755 NID2  | -1.518311584 |
| MINK1 | -3.628315274 MINK1 | -1.706095954 |
| PAQR3 | -2.50794942 PAQR3  | -1.954959832 |
| CD38  | 1.771672037 CD38   | 1.550358103  |
| CD38  | 1.771672037 CD38   | 1.524166072  |
| PITX2 | -2.890262161 PITX2 | -1.794014119 |
| WASF1 | -1.619243534 WASF1 | -1.540765332 |
| SNAI2 | -2.831356906 SNAI2 | -1.746003173 |
| DPP6  | 1.715735476 DPP6   | 1.507279754  |
| BCAS1 | 1.934740031 BCAS1  | 1.568026813  |
| FAT4  | -6.124341504 FAT4  | -1.752659341 |
| KIF1B | -1.891098435 KIF1B | -1.525108761 |
| OVOL1 | 1.50985019 OVOL1   | 3.397696867  |
| FANCA | -2.110859931 FANCA | -1.777464749 |
| GLI2  | -2.487428918 GLI2  | -1.670139633 |
| BRWD1 | -1.886500044 BRWD1 | -1.770617978 |
| DSCAM | 1.852557522 DSCAM  | 2.216113982  |
| IL4   | 1.51000297 IL4     | 2.589760231  |
| CEP70 | -2.371529388 CEP70 | -1.550201792 |
| BAZ1B | -1.68683951 BAZ1B  | -1.549576074 |
| CCL24 | 2.537817857 CCL24  | 25.10020385  |
| CCL24 | 2.537817857 CCL24  | 15.54063523  |
| NCALD | 1.566384896 NCALD  | 1.793626086  |
| NEK6  | 2.290370679 NEK6   | 1.539551223  |
| RGS16 | 1.599675386 RGS16  | 2.289020948  |
| PRG2  | 1.733567453 PRG2   | 1.762927202  |
| TAOK3 | -2.162861972 TAOK3 | -1.639470412 |
| IFI44 | 1.766425788 IFI44  | 1.706939398  |
| RXRG  | 1.659944593 RXRG   | 1.847043094  |
| SIAE  | -1.562608914 SIAE  | -1.770088493 |
| SIAE  | -1.562608914 SIAE  | -1.686510198 |
| ISOC1 | -1.673345606 ISOC1 | -1.91711263  |
| NPY5R | -1.556285147 NPY5R | -4.189817211 |
| CPEB4 | -2.277492602 CPEB4 | -1.60080142  |
| EP400 | -3.046620196 EP400 | -1.677150219 |
| PNOC  | 1.68613461 PNOC    | 1.517274286  |
| CUX2  | 1.709073446 CUX2   | 1.64219283   |
| DEK   | -3.766237525 DEK   | -1.62069005  |
| HHATL | 1.815964247 HHATL  | 2.045784226  |
| NCK1  | -2.711336631 NCK1  | -1.625223629 |
| AMBP  | 1.741582126 AMBP   | 4.137514969  |
| SPSB4 | 1.970104636 SPSB4  | 1.778013913  |
| SLTM  | -2.493519432 SLTM  | -1.970280554 |
| SLTM  | -2.493519432 SLTM  | -1.53118796  |
| RORA  | -2.289872465 RORA  | -1.769917261 |

|       |                        |              |
|-------|------------------------|--------------|
| SMAD4 | -1.820080917 SMAD4     | -1.756892859 |
| PDXK  | -2.324620987 PDXK      | -1.586464669 |
| CEP72 | -1.797995499 CEP72     | -1.821977726 |
| ECM2  | -7.328596123 ECM2      | -1.860073521 |
| GATA6 | -1.524505135 GATA6     | -1.715035329 |
| EMP2  | -2.142379626 EMP2      | -1.509073154 |
| ABHD3 | -3.641400563 ABHD3     | -1.522413495 |
| PPTC7 | -2.385069129 PPTC7     | -1.793604629 |
| AGK   | -1.927986607 AGK       | -1.628522005 |
| AMPH  | -5.171801682 AMPH      | -1.832445041 |
| CD109 | -1.642595385 CD109     | -1.989996807 |
| SYN1  | 2.049015118 SYN1       | 1.912592307  |
| RBBP6 | -3.17996773 RBBP6      | -1.618363544 |
| UHMK1 | -1.500558994 UHMK1     | -1.570331025 |
| FOSL2 | 1.851173292 FOSL2      | 1.707019348  |
| MYOF  | -2.211112647 MYOF      | -2.199955349 |
| LRCH3 | -1.618699851 LRCH3     | -1.778476234 |
| STAG1 | -3.79261082 STAG1      | -1.510385574 |
| RAG1  | -1.920744879 RAG1      | -5.046400882 |
| SESN3 | -1.815993451 SESN3     | -1.5119784   |
| EPOR  | -1.740364402 EPOR      | -1.814146006 |
| MCM4  | -2.399927299 MCM4      | -1.623684267 |
| HDX   | -3.404324872 HDX       | -1.74628121  |
| STK38 | -2.830657127 STK38     | -1.884144937 |
| SRBD1 | -2.664592115 SRBD1     | -1.803060188 |
| XPO1  | -1.956764163 XPO1      | -1.681182676 |
| TEX2  | -1.694646948 TEX2      | -1.669852673 |
| BCOR  | -2.153200414 BCOR      | -1.570821577 |
| LUZP1 | -3.571693943 LUZP1     | -1.625792698 |
| TAL2  | 1.936612797 TAL2       | 1.976619062  |
| SYT12 | 4.773950419 SYT12      | 2.029773096  |
| AOC3  | -2.01771678 AOC3       | -2.29825996  |
| PRR15 | 1.505964108 PRR15      | 2.271267227  |
| TXLNB | -1.948033502 TXLNB     | -1.997330605 |
| NETO1 | 1.787464913 NETO1      | 1.972573965  |
| HIAT1 | -1.69829943 HIAT1      | -1.649681739 |
| BUB3  | -2.293113622 BUB3      | -1.930611788 |
| WDR37 | -1.909986236 WDR37     | -1.598842169 |
| PTPRR | -2.390383623 PTPRR     | -1.548217088 |
| EFS   | 1.747725003 EFS        | 1.71133874   |
| TMOD2 | -1.746110438 TMOD2     | -1.536201147 |
| IRF5  | 1.547605572 IRF5       | 1.636394336  |
| ASB4  | 2.031047458 ASB4       | 2.078480745  |
| RAMP1 | 6.815613526 RAMP1      | 1.696335332  |
| ASPM  | -3.164522801 ASPM      | -1.594738224 |
| IFIT1 | 1.557463555 IFIT1      | 1.61697818   |
| IFIT1 | 1.557463555 MOUSE16989 | 1.61697818   |

|       |                    |              |
|-------|--------------------|--------------|
| STIM1 | -1.764764345 STIM1 | -1.87742021  |
| STIM1 | -1.764764345 STIM1 | -1.704691505 |
| PTPRB | -1.767424858 PTPRB | -2.17008028  |
| RIF1  | -1.769797577 RIF1  | -1.75290082  |
| KRCC1 | -1.753170333 KRCC1 | -1.616496252 |
| TPBG  | -1.710705362 TPBG  | -1.8725925   |
| PDE3A | 1.88992909 PDE3A   | 1.846159541  |
| MTM1  | -4.089343153 MTM1  | -1.525566083 |
| GPSM2 | -2.094361616 GPSM2 | -1.654926408 |
| RAB2B | -2.490425529 RAB2B | -1.513553394 |
| KCNN4 | 1.897463969 KCNN4  | 2.56794361   |
| HYAL1 | -1.569168298 HYAL1 | -1.867785661 |
| CD47  | -2.383703796 CD47  | -1.709914327 |
| NMU   | -1.811608168 NMU   | -3.741180775 |
| ENPP4 | -2.042989853 ENPP4 | -1.619670829 |
| HYOU1 | -1.512921387 HYOU1 | -1.70131998  |
| PIGB  | -2.989913268 PIGB  | -1.687022192 |
| CAB39 | -2.123203068 CAB39 | -1.744506069 |
| PSME4 | -2.402162724 PSME4 | -1.509769452 |
| SFRP2 | -1.938956805 SFRP2 | -1.758299907 |
| MAT2B | -2.044053707 MAT2B | -1.846081079 |
| ISG15 | 2.016692311 ISG15  | 2.013779916  |
| SRPR  | -1.65882245 SRPR   | -1.728788935 |
| SRPR  | -1.65882245 SRPR   | -2.21396761  |
| GAN   | -2.584270187 GAN   | -2.285062119 |
| FN3K  | 2.782662874 FN3K   | 1.836082749  |
| KCNK3 | 1.726804213 KCNK3  | 1.688557648  |
| APH1A | -2.515908248 APH1A | -1.600355045 |
| ACCN3 | 1.642691767 ACCN3  | 2.08572331   |
| PRPS2 | -2.606065739 PRPS2 | -1.62655213  |
| LIN7A | -1.66977034 LIN7A  | -1.728582454 |
| LRRK1 | -1.550664262 LRRK1 | -1.53651322  |
| SYNM  | -1.8272977 SYNM    | -1.710636745 |
| PKD2  | -3.802920169 PKD2  | -1.539132535 |
| SYT15 | -1.756894596 SYT15 | -1.777813327 |
| APOC1 | 4.227142022 APOC1  | 1.577311803  |
| FOXK1 | -1.82946317 FOXK1  | -1.543562811 |
| CAV1  | -1.9543435 CAV1    | -1.864272915 |
| SV2A  | -2.088845905 SV2A  | -1.786587312 |
| KIF1B | -2.571423466 KIF1B | -1.777258815 |
| SLK   | -4.04820135 SLK    | -1.955039696 |
| HYDIN | 2.205371457 HYDIN  | 1.850029147  |
| ECE1  | -1.774731596 ECE1  | -1.753024728 |
| IL5   | 1.550580892 IL5    | 2.626369659  |
| DAG1  | -2.032800854 DAG1  | -1.715570305 |
| DAG1  | -2.032800854 DAG1  | -1.630813153 |
| PER3  | -1.958758067 PER3  | -1.535824825 |

|       |                         |              |
|-------|-------------------------|--------------|
| ABCA1 | -2.420406852 ABCA1      | -1.527939667 |
| TSN   | -1.591638364 TSN        | -1.699671199 |
| SENP7 | -1.953542242 SENP7      | -2.139322874 |
| CHST3 | -2.429538794 CHST3      | -1.89510161  |
| NOVA1 | -2.492572658 NOVA1      | -1.563025844 |
| TLK1  | -2.211720638 TLK1       | -2.162642761 |
| UHMK1 | -2.093821213 UHMK1      | -1.570331025 |
| PER3  | -3.315519802 PER3       | -1.535824825 |
| TMCC3 | -1.727776854 TMCC3      | -1.809979818 |
| TFF1  | 1.500316835 TFF1        | 2.587548306  |
| XPO4  | -2.133891735 XPO4       | -1.758268818 |
| XPR1  | -2.276022306 XPR1       | -1.649756726 |
| DCTD  | -2.387658717 DCTD       | -1.661403504 |
| ING5  | 1.5458581 ING5          | 1.717651367  |
| VAMP3 | -1.818432516 VAMP3      | -1.562323116 |
| PANK3 | -2.211952754 PANK3      | -2.323370356 |
| FKBP5 | -4.199408104 FKBP5      | -1.531820562 |
| RRN3  | -2.703658875 RRN3       | -1.719421272 |
| INO80 | -2.029725395 INO80      | -1.577295702 |
| CENPA | -7.134303468 CENPA      | -1.540452726 |
| KLF3  | -1.796949193 KLF3       | -1.635853174 |
| PEX12 | -1.766073417 PEX12      | -1.687091629 |
| SCOC  | -3.061940485 SCOC       | -1.538959521 |
| ELL3  | -1.898814525 ELL3       | -1.573430916 |
| LYPD3 | -3.021396048 LYPD3      | -2.426041231 |
| EVC   | -2.862992332 EVC        | -1.510498576 |
| CPNE3 | -4.99569865 CPNE3       | -1.638468841 |
| KIF1B | -1.633080611 KIF1B      | -1.525108761 |
| MEX3B | -2.605897023 MEX3B      | -1.535431504 |
| UQCC  | -1.574243918 UQCC       | -1.731414554 |
| XPR1  | -2.188205826 XPR1       | -1.649756726 |
| CD59  | -1.522070306 MOUSE18474 | -1.508844602 |
| CD59  | -1.522070306 CD59A      | -1.508844602 |
| YPEL2 | -1.958714805 YPEL2      | -1.815144676 |
| MXRA7 | -3.370437252 MXRA7      | -1.90359572  |
| MMP14 | 1.706687671 MMP14       | 1.51929836   |
| MKLN1 | -1.511978607 MKLN1      | -1.548464807 |
| AP4E1 | -1.794229128 AP4E1      | -1.81515301  |
| RFT1  | -1.733630849 RFT1       | -1.953628701 |
| PLCB1 | -1.656325365 PLCB1      | -1.788635646 |
| NR1D2 | -2.673188255 NR1D2      | -1.894647562 |
| ARL5B | -2.146122136 ARL5B      | -1.676296782 |
| RRP1B | -2.565001256 RRP1B      | -1.667635641 |
| FOXO3 | -1.607481556 FOXO3      | -1.525764132 |
| WDFY3 | -2.409988846 WDFY3      | -1.555345151 |
| FANCM | -2.364569841 FANCM      | -1.760297921 |
| ECEL1 | 3.998591453 ECEL1       | 1.770665924  |

|       |                    |              |
|-------|--------------------|--------------|
| SATB2 | -2.016131592 SATB2 | -1.532901626 |
| TOB2  | -1.542472572 TOB2  | -2.85670672  |
| ST7   | -1.56730485 ST7    | -1.558205807 |
| FMNL2 | -2.436153015 FMNL2 | -1.547745004 |
| NCAM2 | -2.059497514 NCAM2 | -1.530954539 |
| QSOX2 | -1.77891711 QSOX2  | -1.546557269 |
| TDRD9 | -1.801520632 TDRD9 | -2.205510044 |
| ACACA | -1.747195085 ACACA | -1.697305817 |
| RABL3 | -1.674240646 RABL3 | -2.045760276 |
| NOP14 | -1.984112219 NOP14 | -1.549064328 |
| SHC4  | 1.78984533 SHC4    | 1.644632845  |
| RPRML | 1.74380016 RPRML   | 1.619216209  |
| KDSR  | -1.72169485 KDSR   | -1.588935161 |
| LCORL | -1.826192154 LCORL | -1.922746923 |
| FHAD1 | 1.611743043 FHAD1  | 2.012175331  |
| TIMP4 | 2.334367668 TIMP4  | 1.555609689  |
| PNPT1 | -1.653566748 PNPT1 | -1.58182235  |
| PANK3 | -1.762145094 PANK3 | -2.323370356 |
| ATF3  | 1.506978877 ATF3   | 1.664573331  |
| EMR1  | 2.282016817 EMR1   | 1.918319357  |
| LPP   | -1.663452549 LPP   | -1.635975545 |
| SPHK1 | 2.993054693 SPHK1  | 1.694885886  |
| CD7   | 1.789890891 CD7    | 1.805431779  |
| FXYD3 | 1.616295316 FXYD3  | 1.55952165   |
| FXYD3 | 2.257671733 FXYD3  | 1.55952165   |
| FXYD3 | 2.479617303 FXYD3  | 1.55952165   |
| KIF1B | -1.664788943 KIF1B | -1.525108761 |
| TDRD1 | 1.59038203 TDRD1   | 1.681515585  |
| MT1G  | 2.247855948 MT2    | 1.948084489  |
| RAMP1 | 6.694119948 RAMP1  | 1.696335332  |
| LXN   | -2.601743388 LXN   | -1.515321905 |
| TIMD4 | 1.765935569 TIMD4  | 3.443661065  |
| MT1X  | 1.699313219 MT2    | 1.948084489  |
| IDS   | -1.510340334 IDS   | -1.58220915  |
| PANK3 | -1.917839846 PANK3 | -2.323370356 |
| VASH2 | 1.904853317 VASH2  | 2.277472278  |
| MAT2B | -1.986476222 MAT2B | -1.846081079 |
| SMC4  | -2.019066235 SMC4  | -1.623316968 |
| FAIM2 | 2.856229998 FAIM2  | 1.849599631  |
| CBL   | -3.091551258 CBL   | -2.050671262 |
| LUZP1 | -1.615958545 LUZP1 | -1.625792698 |
| MMP25 | 1.669960896 MMP25  | 1.949635433  |
| LRRC4 | 2.039159292 LRRC4  | 1.512808136  |
| RIN1  | 2.172194851 RIN1   | 1.809450005  |
| LYZL1 | 3.423284669 LYZL1  | 1.817070873  |
| SYN3  | 1.592226535 SYN3   | 1.62714774   |
| MSH2  | -1.946014671 MSH2  | -1.507881606 |

|       |                    |              |
|-------|--------------------|--------------|
| ASPM  | -5.858728138 ASPM  | -1.594738224 |
| AAK1  | -1.736748239 AAK1  | -1.578763643 |
| PAQR3 | -1.651835404 PAQR3 | -1.954959832 |
| GFRA1 | 1.78609794 GFRA1   | 1.597827432  |
| AFF2  | -4.499444049 AFF2  | -1.741100136 |
| AFF2  | -4.499444049 AFF2  | -1.680411184 |
| RAB2B | -1.899388098 RAB2B | -1.513553394 |
| FGF22 | -1.712233081 FGF22 | -1.622233332 |
| PDE7A | -2.266720688 PDE7A | -1.62746013  |
| LYPD3 | -1.920430084 LYPD3 | -2.426041231 |
| LMNB1 | 1.693183155 LMNB1  | 1.863918008  |
| PGAP1 | -1.749392721 PGAP1 | -1.65972342  |
| CCL3  | 1.960692052 CCL3   | 2.415240623  |
| CALY  | 1.986117921 CALY   | 1.545170007  |
| NTRK3 | -1.940087087 NTRK3 | -1.947398701 |
| CRYAA | 1.531474565 CRYAA  | 2.773436749  |
| SMG5  | 2.097688944 SMG5   | 1.67710321   |
| LHX8  | 1.557697944 LHX8   | 1.963127951  |
| SP4   | -2.149328537 SP4   | -2.999298625 |
| IDS   | -1.672373265 IDS   | -1.58220915  |
| KIF22 | 1.769868994 KIF22  | 2.257191412  |
| ETV6  | 2.615181096 ETV6   | 1.56284826   |
| LYPD6 | -2.163756663 LYPD6 | -1.586227165 |
| FRMD3 | -1.814244541 FRMD3 | -3.660192791 |
| FRMD3 | -1.589338012 FRMD3 | -3.660192791 |
| JPH1  | -2.237920748 JPH1  | -1.523205396 |
| CHST6 | 1.836389871 CHST5  | 2.515841772  |
| BBX   | -1.525006936 BBX   | -2.024688265 |
| SGTB  | -1.679140072 SGTB  | -1.725657828 |
| DDX52 | -1.977837904 DDX52 | -1.573722362 |
| TDRD1 | 2.846571249 TDRD1  | 1.681515585  |
| WAC   | -1.55359595 WAC    | -1.610801329 |
| UNC5A | 1.911258025 UNC5A  | 1.615541703  |
| SENP6 | -1.586538751 SENP6 | -1.701610351 |
| PDE4D | -1.819926098 PDE4D | -1.572534938 |
| FSD2  | -2.304021906 FSD2  | -1.732362317 |
| PTAFR | 3.378828968 PTAFR  | 1.733694329  |
| SYNPO | -1.803076842 SYNPO | -1.708090658 |
| GLP2R | 1.579723442 GLP2R  | 1.579959458  |
| PRR11 | -2.110958486 PRR11 | -2.191220873 |
| MPP4  | -1.738313361 MPP4  | -1.544849693 |
| RBM39 | -1.671295655 RBM39 | -1.629745828 |
| FRMD3 | -1.969400867 FRMD3 | -3.660192791 |
| GULP1 | -2.870092205 GULP1 | -1.558498364 |
| NR1D2 | -1.507145838 NR1D2 | -1.894647562 |
| DDX58 | -1.504964517 DDX58 | -1.79609363  |
| AQP4  | 2.548542898 AQP4   | 1.829027843  |

ABCA1  
P2RX6  
SMC4  
DERL3

-2.143072864 ABCA1  
-2.31112923 P2RX6  
-3.883731986 SMC4  
1.90678278 DERL3

-1.527939667  
-1.835245181  
-1.623316968  
1.630292289

| in_vitro_gene_name | in_vitro_fold_change | in_vivo_gene_name | in_vivo_fold_change |
|--------------------|----------------------|-------------------|---------------------|
| MARCO              | 2.496556478          | MARCO             | 1.868722943         |
| CHPT1              | -2.059535457         | CHPT1             | -1.589554984        |
| CDCP1              | 1.658631646          | CDCP1             | 1.956647136         |
| PHEX               | -2.12590404          | PHEX              | -1.675266022        |
| VASH2              | 1.617809433          | VASH2             | 2.277472278         |
| CCAR1              | -1.607835334         | CCAR1             | -1.642706235        |
| INHBA              | 1.558873899          | INHBA             | 1.605178962         |
| CAV1               | -1.800660308         | CAV1              | -1.864272915        |
| CLIC4              | -1.85655062          | CLIC4             | -1.507639144        |
| SMC3               | -1.547565535         | SMC3              | -1.904091694        |
| NRIP2              | -1.624792151         | NRIP2             | -1.685940617        |
| ADAT1              | -1.569132077         | ADAT1             | -1.520807919        |
| CDC7               | -1.509330208         | CDC7              | -1.549683152        |
| INHBB              | 5.455927368          | INHBB             | 1.590493518         |
| GRB14              | -1.654451421         | GRB14             | -3.936827786        |
| WDR60              | -1.849694127         | WDR60             | -1.921056445        |
| BEX1               | -1.530344835         | BEX2              | -1.830838376        |
| BEX1               | -1.530344835         | BEX1              | -1.830838376        |
| KLK1               | 2.202196184          | K1KB3             | 1.877494312         |
| KLK1               | 2.202196184          | KLK1              | 1.877494312         |
| NID2               | -1.555335505         | NID2              | -1.518311584        |
| MINK1              | -1.794154602         | MINK1             | -1.706095954        |
| PAQR3              | -1.544567831         | PAQR3             | -1.954959832        |
| PITX2              | -1.594654892         | PITX2             | -1.793051305        |
| IP6K3              | -2.221153569         | IP6K3             | -1.650972276        |
| WASF1              | -1.675458945         | WASF1             | -1.540765332        |
| SNAI2              | -1.746826164         | SNAI2             | -1.746003173        |
| ITM2A              | 2.187063498          | ITM2A             | 1.902775624         |
| FBXL2              | 1.514941613          | FBXL2             | 1.542615632         |
| FAT4               | -2.591641209         | FAT4              | -1.628145218        |
| BRWD1              | -1.687038853         | BRWD1             | -1.770617978        |
| CNR1               | -3.75767127          | CNR1              | -2.832246115        |
| CEP70              | -1.793753637         | CEP70             | -1.550201792        |
| NEK6               | 1.728946455          | NEK6              | 1.657397154         |
| RGS16              | 2.039279812          | RGS16             | 2.289020948         |
| IFI44              | 1.500919188          | IFI44             | 1.706939398         |
| RRP12              | 1.558793615          | RRP12             | 1.608948426         |
| CPEB4              | -2.188879673         | CPEB4             | -1.60080142         |
| DEK                | -2.35267961          | DEK               | -1.62069005         |
| NCK1               | -1.840155597         | NCK1              | -1.625223629        |
| PCSK5              | 1.652021392          | PCSK5             | 1.531429452         |
| GDF5               | -1.659500005         | GDF5              | -1.627505102        |
| PDXK               | -2.635834278         | PDXK              | -1.586464669        |
| ECM2               | -1.865643017         | ECM2              | -1.860073521        |
| EMP2               | -1.707740066         | EMP2              | -1.509073154        |
| DISP2              | 1.827436182          | DISP2             | 1.539361934         |



|       |              |       |              |
|-------|--------------|-------|--------------|
| CD33  | 1.763608374  | CD33  | 2.510273127  |
| SYN1  | 2.039032466  | SYN1  | 1.912592307  |
| RBBP6 | -2.011013651 | RBBP6 | -1.618363544 |
| FOSL2 | 3.037913467  | FOSL2 | 1.707019348  |
| STAG1 | -1.574647132 | STAG1 | -1.510385574 |
| SESN3 | -2.696571078 | SESN3 | -1.5119784   |
| DNER  | -1.743510164 | DNER  | -1.866805864 |
| EPOR  | -1.826617559 | EPOR  | -1.814146006 |
| STK38 | -1.556424737 | STK38 | -1.884144937 |
| MMP9  | 2.709162125  | MMP9  | 1.810689704  |
| LUZP1 | -1.77092396  | LUZP1 | -1.625792698 |
| TAL2  | 1.644044064  | TAL2  | 1.976619062  |
| EREG  | -1.593283622 | EREG  | -2.802929384 |
| EREG  | -1.593283622 | EREG  | -1.514094799 |
| SYT12 | 1.661637028  | SYT12 | 2.029355298  |
| AOC3  | -2.065584979 | AOC3  | -2.29825996  |
| PAX9  | -1.589772381 | PAX9  | -2.313383108 |
| VLDLR | -1.546035315 | VLDLR | -1.610341211 |
| EGR2  | 1.618579173  | EGR2  | 2.155968061  |
| WDR37 | -1.925776205 | WDR37 | -1.598842169 |
| PTPRR | -1.690289334 | PTPRR | -1.548217088 |
| RAMP1 | 5.87492042   | RAMP1 | 1.696335332  |
| ASPM  | -2.659389021 | ASPM  | -1.594738224 |
| PTPRB | -1.635314114 | PTPRB | -2.17008028  |
| KRCC1 | -1.708711857 | KRCC1 | -1.616496252 |
| MTM1  | -4.184308809 | MTM1  | -1.525566083 |
| GPSM2 | -1.712853497 | GPSM2 | -1.620099024 |
| KCNN4 | 1.502994846  | KCNN4 | 2.56794361   |
| HYAL1 | -1.921818415 | HYAL1 | -1.867785661 |
| CD47  | -1.852101418 | CD47  | -1.709914327 |
| NMU   | -2.364523372 | NMU   | -3.741180775 |
| CD83  | 1.773771946  | CD83  | 1.810775237  |
| PIGB  | -2.090217699 | PIGB  | -1.553816796 |
| MAT2B | -1.787949741 | MAT2B | -1.846081079 |
| ISG15 | 1.842355947  | ISG15 | 2.013779916  |
| APH1A | -1.548315749 | APH1A | -1.600355045 |
| PRPS2 | -1.622053538 | PRPS2 | -1.62655213  |
| LIN7A | -2.066572451 | LIN7A | -1.728582454 |
| SYNM  | -1.514651567 | SYNM  | -2.1757693   |
| APOC1 | 2.318002643  | APOC1 | 1.577311803  |
| SV2A  | -1.650106404 | SV2A  | -1.575743206 |
| SLK   | -2.15234182  | SLK   | -1.955039696 |
| HYDIN | 1.663071217  | HYDIN | 1.850029147  |
| ABCA1 | -1.870277994 | ABCA1 | -1.527939667 |
| PDK4  | 1.839125323  | PDK4  | 2.991829217  |
| PPT1  | -1.517444551 | PPT1  | -1.574709455 |
| RSAD2 | 2.085462697  | RSAD2 | 2.161059696  |

|       |                    |              |
|-------|--------------------|--------------|
| PER3  | -1.904732512 PER3  | -1.535824825 |
| TMCC3 | -1.974628627 TMCC3 | -1.809979818 |
| KCNB1 | 2.52904386 KCNB1   | 1.520144417  |
| LYPD5 | 1.754532038 LYPD5  | 1.690279017  |
| DCTD  | -1.671520826 DCTD  | -1.661403504 |
| PDE7A | -1.554557008 PDE7A | -1.62746013  |
| PANK3 | -1.798371043 PANK3 | -2.323370356 |
| INO80 | -1.797599065 INO80 | -1.577295702 |
| CENPA | -3.551826278 CENPA | -1.540452726 |
| KLF3  | -1.596884034 KLF3  | -1.635853174 |
| COTL1 | 1.648499597 COTL1  | 1.510740209  |
| SCOC  | -2.404563441 SCOC  | -1.538959521 |
| ELL3  | -2.649260736 ELL3  | -1.573430916 |
| LYPD3 | -2.594208253 LYPD3 | -2.426041231 |
| EVC   | -2.400396255 EVC   | -1.510498576 |
| CPNE3 | -2.501732421 CPNE3 | -1.638468841 |
| YPEL2 | -1.762822293 YPEL2 | -1.815144676 |
| MXRA7 | -1.745105251 MXRA7 | -1.90359572  |
| MMP14 | 1.839957841 MMP14  | 1.708870227  |
| BRWD1 | -1.61616897 BRWD1  | -1.770617978 |
| PLCB1 | -1.803315287 PLCB1 | -1.663050552 |
| ARL5B | -2.744676389 ARL5B | -1.676296782 |
| WDFY3 | -1.8413833 WDFY3   | -1.555345151 |
| ECEL1 | 2.536464213 ECEL1  | 1.770665924  |
| RCOR3 | -1.50057656 RCOR3  | -2.252534115 |
| SATB2 | -1.970896483 SATB2 | -1.532901626 |
| ST7   | -1.784151577 ST7   | -1.558205807 |
| TDRD9 | -2.527398292 TDRD9 | -2.205510044 |
| LCORL | -1.821864379 LCORL | -1.922746923 |
| PAG1  | -1.635844605 PAG1  | -1.678885089 |
| GLP2R | 2.175806945 GLP2R  | 1.579959458  |
| EMR1  | 1.803451396 EMR1   | 1.987732426  |
| SPHK1 | 1.715254376 SPHK1  | 2.248272939  |
| FXYD3 | 1.803246018 FXYD3  | 1.55952165   |
| FXYD3 | 1.681532782 FXYD3  | 1.55952165   |
| LXN   | -2.105760292 LXN   | -1.515321905 |
| CAPZB | -1.703006887 CAPZB | -1.584507083 |
| PANK3 | -1.64467014 PANK3  | -2.323370356 |
| MAT2B | -1.961676632 MAT2B | -1.846081079 |
| SMC4  | -1.882790262 SMC4  | -1.623316968 |
| LUZP1 | -1.60184034 LUZP1  | -1.625792698 |
| RIN1  | 1.51979216 RIN1    | 1.809450005  |
| LYZL1 | 2.221571144 LYZL1  | 1.817070873  |
| DDX21 | -1.904153305 DDX21 | -1.710160356 |
| ASPM  | -4.732335768 ASPM  | -1.594738224 |
| AAK1  | -1.683703472 AAK1  | -1.578763643 |
| GFRA1 | 2.480759429 GFRA1  | 1.597827432  |

|       |              |       |              |
|-------|--------------|-------|--------------|
| LYPD3 | -1.67151295  | LYPD3 | -2.426041231 |
| FMNL2 | 1.539537759  | FMNL2 | 1.915254272  |
| CCL3  | 1.900570567  | CCL3  | 2.415240623  |
| SMG5  | 1.904512765  | SMG5  | 1.67710321   |
| LCORL | -1.603259577 | LCORL | -1.922746923 |
| IDS   | -1.802860112 | IDS   | -1.58220915  |
| ETV6  | 1.752901838  | ETV6  | 1.56284826   |
| FRMD3 | -1.550720128 | FRMD3 | -3.660192791 |
| TDRD1 | 1.804819741  | TDRD1 | 1.681515585  |
| UNC5A | 1.554837037  | UNC5A | 1.615541703  |
| MORN3 | 1.775491616  | MORN3 | 1.663381425  |
| SENP6 | -1.713181044 | SENP6 | -1.797536015 |
| PDE4D | -2.181257516 | PDE4D | -1.594853213 |
| PTAFR | 1.879667069  | PTAFR | 1.733694329  |
| GLP2R | 1.928529459  | GLP2R | 1.579959458  |
| PRR11 | -1.910826462 | PRR11 | -1.885977691 |
| MPP4  | -1.654096519 | MPP4  | -1.544849693 |
| EIF3D | -1.563085098 | EIF3D | -2.295751394 |
| ABCA1 | -1.597157996 | ABCA1 | -1.527939667 |
| GFRA1 | 1.778199259  | GFRA1 | 1.597827432  |
| SMC4  | -2.597284317 | SMC4  | -1.623316968 |

| <b>in_vitro_gene_name</b> | <b>in_vitro_fold_change</b> | <b>in_vivo_gene_name</b> | <b>in_vivo_fold_change</b> |
|---------------------------|-----------------------------|--------------------------|----------------------------|
| XBP1                      | 1.519823655                 | XBP1                     | 1.544682523                |
| LXN                       | -2.421658086                | LXN                      | -1.515321905               |
| GCH1                      | 2.076940054                 | GCH1                     | 1.628844437                |

| in_vitro_gene_name | in_vitro_fold_change | in_vivo_gene_name |
|--------------------|----------------------|-------------------|
| GRP                | 2.023325565          | GRP               |
| LOXL2              | -1.557508356         | LOXL2             |
| CDCP1              | 1.67534724           | CDCP1             |
| CEP55              | 2.587023412          | CEP55             |
| ASF1B              | 1.91127845           | ASF1B             |
| XBP1               | 1.562169913          | XBP1              |
| CXXC4              | 1.518931415          | CXXC4             |
| DBP                | -1.791420575         | DBP               |
| CRYAA              | 2.026582881          | CRYAA             |
| PROZ               | 2.189369676          | PROZ              |
| PROZ               | 2.189369676          | PROZ              |
| PROZ               | 2.189369676          | PROZ              |
| S100B              | 1.835452466          | S100B             |
| IRX3               | 2.395973345          | IRX3              |
| FOSL1              | 2.349840068          | FOSL1             |
| BUB1B              | 2.3594243            | BUB1B             |
| ERMP1              | -2.011657242         | ERMP1             |
| MAFB               | 2.145296306          | MAFB              |
| LRP8               | 1.790262427          | LRP8              |
| LRP8               | 1.790262427          | LRP8              |
| PEX1               | -1.598194619         | PEX1              |
| OVOL1              | 1.620691181          | OVOL1             |
| IPO5               | 1.565457301          | IPO5              |
| PRC1               | 1.902182098          | PRC1              |
| SYCP2              | 1.690311707          | SYCP2             |
| PERP               | -1.508232821         | PERP              |
| PRG2               | 1.656138852          | PRG2              |
| RRP15              | 1.880421097          | RRP15             |
| CD180              | -5.338628713         | CD180             |
| LMNB1              | 1.972632521          | LMNB1             |
| WDHD1              | 1.798101166          | WDHD1             |
| AREG               | 2.20168269           | AREG              |
| RFTN1              | -1.652108209         | RFTN1             |
| NUAK1              | -1.945661839         | NUAK1             |
| BEND7              | -1.809569878         | BEND7             |
| TFPI2              | 1.710394733          | TFPI2             |
| EDIL3              | -8.188644885         | EDIL3             |
| GGCT               | 1.517609544          | GGCT              |
| VLDLR              | -2.089976713         | VLDLR             |
| CDKN3              | 2.341327725          | CDKN3             |
| SPC25              | 7.03759787           | SPC25             |
| KIF22              | 1.596598934          | KIF22             |
| CCNA2              | 2.5686765            | CCNA2             |
| IL6                | 2.637704796          | IL6               |
| EIF3A              | -2.131690415         | EIF3A             |
| SAA4               | 1.663802548          | SAA4              |

|       |              |            |
|-------|--------------|------------|
| RAD51 | 2.410871541  | RAD51      |
| SPAG5 | 1.631166137  | SPAG5      |
| OCLN  | 1.549729942  | OCLN       |
| MELK  | 1.555918969  | MELK       |
| DBC1  | 1.618068693  | DBC1       |
| TEF   | -2.370465238 | TEF        |
| GCH1  | 1.543338013  | GCH1       |
| SGOL1 | 1.754804108  | SGOL1      |
| NR1D1 | -2.340203017 | NR1D1      |
| PGM5  | -1.984518681 | PGM5       |
| SPRY4 | 1.911098622  | SPRY4      |
| UBE2C | 4.708127601  | UBE2C      |
| SSR3  | 1.52746909   | SSR3       |
| ESCO2 | 1.595182119  | ESCO2      |
| FGF12 | 1.702880704  | FGF12      |
| GRHL2 | 1.615586     | GRHL2      |
| EFNB1 | -2.333226467 | EFNB1      |
| FOXO4 | -2.78678379  | FOXO4      |
| LOXL4 | -4.826800212 | LOXL4      |
| GBP4  | -2.858309967 | MOUSE22790 |
| GBP4  | -2.858309967 | MOUSE20554 |
| GBP4  | -2.858309967 | MOUSE22789 |
| GBP4  | -2.858309967 | MOUSE22786 |
| GBP4  | -2.858309967 | GBP4       |
| GBP4  | -2.858309967 | GBP4       |
| EVC   | -3.01010188  | EVC        |
| KIF5C | 1.636532006  | KIF5C      |
| DOCK8 | 1.655516683  | DOCK8      |
| SYCE2 | 1.934266699  | SYCE2      |
| E2F7  | 2.080712657  | E2F7       |
| RRP15 | 2.39176679   | RRP15      |
| GLP2R | 1.818756229  | GLP2R      |
| SLFN5 | -1.922560864 | SLFN5      |
| MAFB  | 1.94390129   | MAFB       |
| OTOP2 | -2.479289403 | OTOP2      |
| FXYD3 | 1.708228709  | FXYD3      |
| LXN   | -2.221684852 | LXN        |
| THOC2 | -2.910053518 | THOC2      |
| CD69  | 1.996984135  | CD69       |
| CCNE2 | 2.9269438    | CCNE2      |
| ULK2  | -2.654087346 | ULK2       |
| AP1S3 | 2.983167171  | AP1S3      |
| ZMIZ1 | -2.129853831 | ZMIZ1      |
| CAB39 | -3.188423953 | CAB39      |
| BAZ1B | -1.509098506 | BAZ1B      |
| ESCO2 | 1.976763683  | ESCO2      |
| BCAS1 | 1.713014965  | BCAS1      |

|       |                    |
|-------|--------------------|
| P2RY1 | 1.628331577 P2RY1  |
| SYT15 | -2.363279112 SYT15 |
| ETV6  | 1.540150081 ETV6   |
| BLNK  | 1.516594467 BLNK   |
| MDH1B | 1.822105099 MDH1B  |
| MDH1B | 1.822105099 MDH1B  |
| SSR1  | 1.744056273 SSR1   |
| CXCR3 | -2.37378737 CXCR3  |
| FRMD3 | -2.716679829 FRMD3 |
| FLNA  | -1.712236516 FLNA  |
| P2RY1 | 1.544690453 P2RY1  |
| CAP2  | 1.713594221 CAP2   |
| MCM10 | 1.872819674 MCM10  |

**in\_vivo\_fold\_change**

3.202494058  
-1.622470311  
1.956647136  
1.556210556  
2.18579697  
1.544682523  
1.989719709  
-3.982987052  
2.773436749  
3.906922665  
3.441897588  
2.653245566  
1.610310761  
1.735646976  
1.816801178  
1.994085212  
-1.610019043  
1.803872942  
2.855911491  
2.165929787  
-1.573367587  
3.397696867  
1.97956624  
2.538746658  
1.53387287  
-1.641661175  
1.762927202  
1.513895062  
-2.500711789  
1.863918008  
1.528054618  
1.541649339  
-1.726230056  
-1.838608451  
-1.898049249  
2.722778163  
-1.52637861  
1.533427225  
-1.598041215  
2.738475788  
1.546481588  
2.257191412  
2.800856395  
4.461864117  
-1.799742206  
2.716768767



2.895705695  
1.791268485  
1.816582167  
1.723781369  
1.773325089  
-1.620582407  
1.628844437  
1.575339463  
-2.12308432  
-2.001550269  
1.527564384  
2.747058774  
1.682716448  
2.080880718  
2.800840269  
1.546823032  
-1.66555589  
-1.518134275  
-1.647935826  
-1.635817004  
-1.635817004  
-1.635817004  
-1.635817004  
-1.635817004  
-1.635817004  
-1.510498576  
1.505388365  
2.172917349  
1.558296286  
1.568358023  
1.513895062  
1.579959458  
-1.657106295  
1.803872942  
-3.791899986  
1.55952165  
-1.515321905  
-1.590341995  
1.546690388  
1.570116011  
-1.503130975  
1.716599689  
-1.672022993  
-1.539661343  
-1.549576074  
2.080880718  
1.568026813

1.921735765  
-1.777813327  
1.56284826  
1.693994238  
2.465930797  
2.49377887  
1.540564031  
-1.59544526  
-3.660192791  
-1.592536535  
1.921735765  
2.368923044  
2.13407347

| in_vitro_gene_name | in_vitro_fold_change | in_vivo_gene_name | in_vivo_fold_change |
|--------------------|----------------------|-------------------|---------------------|
| MSH2               | -1.932349696         | MSH2              | -1.507881606        |
| CHPT1              | -1.906503034         | CHPT1             | -1.658123635        |
| RBM39              | -1.719614765         | RBM39             | -1.629745828        |
| PHEX               | -1.897434472         | PHEX              | -1.675266022        |
| CCAR1              | -1.856182305         | CCAR1             | -1.642706235        |
| DBP                | -2.098855018         | DBP               | -3.982987052        |
| CLIC4              | -2.640304192         | CLIC4             | -1.507639144        |
| SMC3               | -2.203056014         | SMC3              | -1.904091694        |
| RND3               | -2.355010109         | RND3              | -1.560760051        |
| FBXL7              | -1.823967388         | FBXL7             | -1.762334748        |
| ESM1               | -2.991075549         | ESM1              | -1.703473635        |
| LIMA1              | -1.822524874         | LIMA1             | -1.688978239        |
| UBR1               | -2.343310497         | UBR1              | -1.582374304        |
| WDR60              | -2.601653802         | WDR60             | -1.921056445        |
| MYOG               | -1.847977401         | MYOG              | -1.54442107         |
| FOSL1              | 7.582378024          | FOSL1             | 1.816801178         |
| NID2               | -2.40667439          | NID2              | -1.518311584        |
| MINK1              | -2.967204714         | MINK1             | -1.706095954        |
| PAQR3              | -1.813988418         | PAQR3             | -1.954959832        |
| WASF1              | -1.781708797         | WASF1             | -1.540765332        |
| ERMP1              | -2.305550815         | ERMP1             | -1.554694315        |
| BRWD1              | -2.332397707         | BRWD1             | -1.770617978        |
| CLIP2              | 3.06027902           | CLIP2             | 1.541612416         |
| RRP12              | 4.177151765          | RRP12             | 1.608948426         |
| CPEB4              | -2.263460132         | CPEB4             | -1.60080142         |
| EP400              | -2.393246569         | EP400             | -1.677150219        |
| DEK                | -2.675377661         | DEK               | -1.62069005         |
| NCK1               | -3.428474836         | NCK1              | -1.625223629        |
| SATB1              | -2.552791079         | SATB1             | -1.910928665        |
| SETD3              | -2.088772216         | SETD3             | -1.583111911        |
| GDPD3              | -2.214746843         | GDPD3             | -1.513010007        |
| SMAD4              | -2.025993949         | SMAD4             | -1.756892859        |
| PIGH               | -2.048953211         | PIGH              | -1.662914208        |
| ABHD3              | -1.931291884         | ABHD3             | -1.522413495        |
| CD33               | 3.215572505          | CD33              | 2.510273127         |
| CD109              | -1.660167009         | CD109             | -1.989996807        |
| MYOF               | -2.663716576         | MYOF              | -2.199955349        |
| STAG1              | -1.897441438         | STAG1             | -1.510385574        |
| RAG1               | -2.761261007         | RAG1              | -5.046400882        |
| EPOR               | -1.68985398          | EPOR              | -1.814146006        |
| NHSL1              | -1.97049565          | NHSL1             | -1.611978037        |
| STK38              | -3.284042263         | STK38             | -1.884144937        |
| XPO1               | -1.89826583          | XPO1              | -1.730541283        |
| FNDC5              | -1.97758824          | FNDC5             | -1.732949834        |
| TXLNB              | -2.314024055         | TXLNB             | -1.997330605        |
| PLLP               | -3.120355047         | PLLP              | -1.627058959        |

|       |                         |              |
|-------|-------------------------|--------------|
| XK    | 2.514523592 XK          | 1.562055647  |
| PTPRR | -2.699915698 PTPRR      | -1.548217088 |
| PTPRB | -3.224418722 PTPRB      | -2.17008028  |
| KRCC1 | -2.052887035 KRCC1      | -1.616496252 |
| TPBG  | -2.570720534 TPBG       | -1.8725925   |
| ACN9  | 2.52466977 ACN9         | 1.730192482  |
| MTM1  | -3.626975371 MTM1       | -1.525566083 |
| CD47  | -1.961418264 CD47       | -1.709914327 |
| PIGB  | -3.128077797 PIGB       | -1.553816796 |
| CREB1 | -2.058790171 CREB1      | -1.541535569 |
| PSME4 | -2.397299713 PSME4      | -1.509769452 |
| MAT2B | -2.045095261 MAT2B      | -1.846081079 |
| APH1A | -2.435757145 APH1A      | -1.600355045 |
| LRRK1 | -1.737909545 LRRK1      | -1.53651322  |
| PKD2  | -2.619151141 PKD2       | -1.539132535 |
| TTC22 | -1.866679535 TTC22      | -1.899359466 |
| FOXK1 | -2.429113433 FOXK1      | -1.543562811 |
| KIF1B | -1.938496811 KIF1B      | -1.525108761 |
| SLK   | -3.159451707 SLK        | -1.955039696 |
| TEF   | -2.218445002 TEF        | -1.620582407 |
| EFHA2 | -2.239411668 EFHA2      | -1.650017578 |
| ABCA1 | -2.398698472 ABCA1      | -1.527939667 |
| SENP7 | -2.022570184 SENP7      | -2.139322874 |
| TLK1  | -1.983812952 TLK1       | -2.162642761 |
| TMCC3 | -2.032913528 TMCC3      | -1.809979818 |
| LYPD5 | 2.870714212 LYPD5       | 1.690279017  |
| XPO4  | -2.274025404 XPO4       | -1.758268818 |
| XPR1  | -2.614516118 XPR1       | -1.649756726 |
| DCTD  | -2.303634362 DCTD       | -1.661403504 |
| VAMP3 | -1.784270632 VAMP3      | -1.562323116 |
| FOXO4 | -2.01706669 FOXO4       | -1.518134275 |
| RRN3  | -2.382849647 RRN3       | -1.719421272 |
| INO80 | -1.82296358 INO80       | -1.577295702 |
| KLF3  | -1.747587271 KLF3       | -1.635853174 |
| GBP4  | -1.967540214 MOUSE22787 | -1.635817004 |
| GBP4  | -1.967540214 MOUSE22789 | -1.635817004 |
| GBP4  | -1.967540214 MOUSE20554 | -1.635817004 |
| GBP4  | -1.967540214 MOUSE22790 | -1.635817004 |
| GBP4  | -1.967540214 GBP4       | -1.635817004 |
| GBP4  | -1.967540214 MOUSE22786 | -1.635817004 |
| SCOC  | -2.010961889 SCOC       | -1.538959521 |
| EVC   | -2.350997739 EVC        | -1.510498576 |
| MEX3B | -2.816113209 MEX3B      | -1.535431504 |
| UQCC  | -1.846030455 UQCC       | -1.731414554 |
| XPR1  | -2.289312226 XPR1       | -1.649756726 |
| BMPR2 | -2.019068255 BMPR2      | -1.999895709 |
| YPEL2 | -3.728144164 YPEL2      | -1.815144676 |

|       |                    |              |
|-------|--------------------|--------------|
| MXRA7 | -3.342441705 MXRA7 | -1.90359572  |
| NR1D2 | -2.310212529 NR1D2 | -1.894647562 |
| WDFY3 | -2.173627767 WDFY3 | -1.555345151 |
| FANCM | -1.75577925 FANCM  | -1.760297921 |
| NEDD4 | -2.184131426 NEDD4 | -2.458446303 |
| SATB2 | -2.546817092 SATB2 | -1.532901626 |
| E2F7  | 3.627628096 E2F7   | 1.568358023  |
| RABL3 | -2.681420393 RABL3 | -2.045760276 |
| LCORL | -1.853154816 LCORL | -1.922746923 |
| RC3H1 | -1.700195051 RC3H1 | -1.558654418 |
| SPHK1 | 2.644730884 SPHK1  | 1.694885886  |
| KIF1B | -2.263329963 KIF1B | -1.525108761 |
| TCEA2 | -2.505748493 TCEA2 | -1.733031672 |
| ITPR2 | -2.159303034 ITPR2 | -1.561385332 |
| LXN   | -3.221065993 LXN   | -1.515321905 |
| PANK3 | -2.13071416 PANK3  | -2.323370356 |
| KCNE4 | 2.935549502 KCNE4  | 1.977883965  |
| MAT2B | -2.621754096 MAT2B | -1.846081079 |
| SMC4  | -1.886217752 SMC4  | -1.623316968 |
| PTPRR | -1.759642558 PTPRR | -1.548217088 |
| CBL   | -2.140231143 CBL   | -2.050671262 |
| YPEL1 | -2.650267038 YPEL1 | -1.759772866 |
| LUZP1 | -2.202503572 LUZP1 | -1.625792698 |
| THEM5 | -2.087811069 THEM5 | -1.954517815 |
| MSH2  | -1.964335941 MSH2  | -1.507881606 |
| DDX21 | -2.299382929 DDX21 | -1.710160356 |
| ITPR2 | -3.559557423 ITPR2 | -1.561385332 |
| MAGI2 | -1.806751102 MAGI2 | -1.507682906 |
| PGAP1 | -1.964299492 PGAP1 | -1.65972342  |
| SP4   | -1.790340163 SP4   | -2.999298625 |
| FRMD3 | -1.755860746 FRMD3 | -3.660192791 |
| FRMD3 | -2.096929468 FRMD3 | -3.660192791 |
| IPO8  | -1.992034882 IPO8  | -1.54337971  |
| FAT4  | -2.473242121 FAT4  | -1.628145218 |
| PRR11 | -2.190246524 PRR11 | -1.885977691 |
| MPP4  | -3.521935606 MPP4  | -1.544849693 |
| RBM39 | -1.718569797 RBM39 | -1.629745828 |
| GULP1 | -2.582613431 GULP1 | -1.558498364 |
| POSTN | -2.895159966 POSTN | -1.506393198 |
| SMC4  | -2.763530635 SMC4  | -1.623316968 |

| in_vitro_gene_name | in_vitro_fold_change | in_vivo_gene_name | in_vivo_fold_change |
|--------------------|----------------------|-------------------|---------------------|
| MSH2               | -1.932349696         | MSH2              | -1.507881606        |
| CHPT1              | -1.906503034         | CHPT1             | -1.658123635        |
| RBM39              | -1.719614765         | RBM39             | -1.629745828        |
| PHEX               | -1.897434472         | PHEX              | -1.675266022        |
| CCAR1              | -1.856182305         | CCAR1             | -1.642706235        |
| DBP                | -2.098855018         | DBP               | -3.982987052        |
| GFOD1              | -3.808013996         | GFOD1             | -1.597141357        |
| CLIC4              | -2.640304192         | CLIC4             | -1.507639144        |
| SMC3               | -2.203056014         | SMC3              | -1.904091694        |
| ADAT1              | -4.284526321         | ADAT1             | -1.520807919        |
| RND3               | -2.355010109         | RND3              | -1.560760051        |
| FBXL7              | -1.823967388         | FBXL7             | -1.762334748        |
| ESM1               | -2.991075549         | ESM1              | -1.703473635        |
| LIMA1              | -1.822524874         | LIMA1             | -1.688978239        |
| UBR1               | -2.343310497         | UBR1              | -1.582374304        |
| WDR60              | -2.601653802         | WDR60             | -1.921056445        |
| MYOG               | -1.847977401         | MYOG              | -1.54442107         |
| FOSL1              | 7.582378024          | FOSL1             | 1.816801178         |
| RNF6               | -2.051688244         | RNF6              | -1.535399284        |
| NID2               | -2.40667439          | NID2              | -1.518311584        |
| MINK1              | -2.967204714         | MINK1             | -1.706095954        |
| PAQR3              | -1.813988418         | PAQR3             | -1.954959832        |
| WASF1              | -1.781708797         | WASF1             | -1.540765332        |
| ERMP1              | -2.305550815         | ERMP1             | -1.507120653        |
| FAT4               | -10.81936842         | FAT4              | -1.628145218        |
| BRWD1              | -2.332397707         | BRWD1             | -1.770617978        |
| CNR1               | -5.02332054          | CNR1              | -2.832246115        |
| CEP70              | -3.837904192         | CEP70             | -1.550201792        |
| CLIP2              | 3.06027902           | CLIP2             | 1.541612416         |
| RRP12              | 4.177151765          | RRP12             | 1.608948426         |
| CPEB4              | -2.263460132         | CPEB4             | -1.60080142         |
| EP400              | -2.393246569         | EP400             | -1.677150219        |
| DEK                | -2.675377661         | DEK               | -1.62069005         |
| NCK1               | -3.428474836         | NCK1              | -1.625223629        |
| SATB1              | -2.552791079         | SATB1             | -1.910928665        |
| SETD3              | -2.088772216         | SETD3             | -1.583111911        |
| GDPD3              | -2.214746843         | GDPD3             | -1.513010007        |
| SMAD4              | -2.025993949         | SMAD4             | -1.756892859        |
| PIGH               | -2.048953211         | PIGH              | -1.662914208        |
| ABHD3              | -1.931291884         | ABHD3             | -1.522413495        |
| CD33               | 3.215572505          | CD33              | 2.510273127         |
| CD109              | -1.660167009         | CD109             | -1.989996807        |
| MYOF               | -2.663716576         | MYOF              | -2.199955349        |
| STAG1              | -1.897441438         | STAG1             | -1.510385574        |
| RAG1               | -2.761261007         | RAG1              | -5.046400882        |
| EPOR               | -1.68985398          | EPOR              | -1.814146006        |

|       |                         |              |
|-------|-------------------------|--------------|
| HDX   | -4.679024091 HDX        | -1.74628121  |
| NHSL1 | -1.97049565 NHSL1       | -1.611978037 |
| STK38 | -3.284042263 STK38      | -1.884144937 |
| XPO1  | -1.89826583 XPO1        | -1.730541283 |
| LUZP1 | -4.020583721 LUZP1      | -1.625792698 |
| FNDC5 | -1.97758824 FNDC5       | -1.628807872 |
| TXLNB | -2.314024055 TXLNB      | -1.997330605 |
| PLLP  | -3.120355047 PLLP       | -1.627058959 |
| XK    | 2.514523592 XK          | 1.562055647  |
| PTPRR | -2.699915698 PTPRR      | -1.548217088 |
| PYGL  | -2.357740271 PYGL       | -1.616275041 |
| ASPM  | -5.831633687 ASPM       | -1.594738224 |
| PTPRB | -3.224418722 PTPRB      | -2.17008028  |
| KRCC1 | -2.052887035 KRCC1      | -1.616496252 |
| TPBG  | -2.570720534 TPBG       | -1.8725925   |
| ACN9  | 2.52466977 ACN9         | 1.730192482  |
| MTM1  | -3.626975371 MTM1       | -1.525566083 |
| CD47  | -1.961418264 CD47       | -1.709914327 |
| PIGB  | -3.128077797 PIGB       | -1.553816796 |
| CREB1 | -2.058790171 CREB1      | -1.541535569 |
| PSME4 | -2.397299713 PSME4      | -1.509769452 |
| MAT2B | -2.045095261 MAT2B      | -1.846081079 |
| APH1A | -2.435757145 APH1A      | -1.600355045 |
| LRRK1 | -1.737909545 LRRK1      | -1.53651322  |
| PKD2  | -2.619151141 PKD2       | -1.539132535 |
| TTC22 | -1.866679535 TTC22      | -1.899359466 |
| FOXK1 | -2.429113433 FOXK1      | -1.543562811 |
| KIF1B | -1.938496811 KIF1B      | -1.525108761 |
| SLK   | -3.159451707 SLK        | -1.955039696 |
| TEF   | -2.218445002 TEF        | -1.620582407 |
| EFHA2 | -2.239411668 EFHA2      | -1.650017578 |
| ABCA1 | -2.398698472 ABCA1      | -1.527939667 |
| SENP7 | -2.022570184 SENP7      | -2.139322874 |
| TLK1  | -1.983812952 TLK1       | -2.162642761 |
| TMCC3 | -2.032913528 TMCC3      | -1.927239525 |
| LYPD5 | 2.870714212 LYPD5       | 1.690279017  |
| XPO4  | -2.274025404 XPO4       | -1.758268818 |
| XPR1  | -2.614516118 XPR1       | -1.649756726 |
| DCTD  | -2.303634362 DCTD       | -1.748376711 |
| VAMP3 | -1.784270632 VAMP3      | -1.562323116 |
| FOXO4 | -2.01706669 FOXO4       | -1.518134275 |
| RRN3  | -2.382849647 RRN3       | -1.719421272 |
| INO80 | -1.82296358 INO80       | -1.577295702 |
| KLF3  | -1.747587271 KLF3       | -1.635853174 |
| GBP4  | -1.967540214 MOUSE22786 | -1.635817004 |
| GBP4  | -1.967540214 MOUSE20554 | -1.635817004 |
| GBP4  | -1.967540214 MOUSE22790 | -1.635817004 |

|       |                         |              |
|-------|-------------------------|--------------|
| GBP4  | -1.967540214 MOUSE22789 | -1.635817004 |
| GBP4  | -1.967540214 MOUSE22787 | -1.635817004 |
| GBP4  | -1.967540214 GBP4       | -1.635817004 |
| SCOC  | -2.010961889 SCOC       | -1.538959521 |
| EVC   | -2.350997739 EVC        | -1.510498576 |
| CPNE3 | -4.602039034 CPNE3      | -1.638468841 |
| MEX3B | -2.816113209 MEX3B      | -1.535431504 |
| UQCC  | -1.846030455 UQCC       | -1.731414554 |
| XPR1  | -2.289312226 XPR1       | -1.649756726 |
| BMPR2 | -2.019068255 BMPR2      | -1.732929888 |
| YPEL2 | -3.728144164 YPEL2      | -1.815144676 |
| MXRA7 | -3.342441705 MXRA7      | -1.90359572  |
| TANC2 | -2.7807218 TANC2        | -2.124339738 |
| NR1D2 | -2.310212529 NR1D2      | -1.894647562 |
| WDFY3 | -2.173627767 WDFY3      | -1.555345151 |
| FANCM | -1.75577925 FANCM       | -1.760297921 |
| NEDD4 | -2.184131426 NEDD4      | -2.458446303 |
| SATB2 | -2.546817092 SATB2      | -1.532901626 |
| E2F7  | 3.627628096 E2F7        | 1.568358023  |
| RABL3 | -2.681420393 RABL3      | -2.045760276 |
| LCORL | -1.853154816 LCORL      | -1.922746923 |
| RC3H1 | -1.700195051 RC3H1      | -1.558654418 |
| SPHK1 | 2.644730884 SPHK1       | 1.694885886  |
| KIF1B | -2.263329963 KIF1B      | -1.525108761 |
| TCEA2 | -2.505748493 TCEA2      | -1.733031672 |
| ITPR2 | -2.159303034 ITPR2      | -1.561385332 |
| LXN   | -3.221065993 LXN        | -1.515321905 |
| PANK3 | -2.13071416 PANK3       | -2.323370356 |
| KCNE4 | 2.935549502 KCNE4       | 1.977883965  |
| MAT2B | -2.621754096 MAT2B      | -1.846081079 |
| SMC4  | -1.886217752 SMC4       | -1.623316968 |
| PTPRR | -1.759642558 PTPRR      | -1.548217088 |
| CBL   | -2.140231143 CBL        | -2.050671262 |
| YPEL1 | -2.650267038 YPEL1      | -1.759772866 |
| LUZP1 | -2.202503572 LUZP1      | -1.625792698 |
| MSH2  | -1.964335941 MSH2       | -1.507881606 |
| ITPR2 | -3.559557423 ITPR2      | -1.58860971  |
| MAGI2 | -1.806751102 MAGI2      | -1.507682906 |
| PGAP1 | -1.964299492 PGAP1      | -2.21974253  |
| SP4   | -1.790340163 SP4        | -2.999298625 |
| EGFR  | -2.157905717 EGFR       | -2.061241762 |
| FRMD3 | -1.755860746 FRMD3      | -3.660192791 |
| FRMD3 | -2.096929468 FRMD3      | -3.660192791 |
| IPO8  | -1.992034882 IPO8       | -1.54337971  |
| FAT4  | -2.473242121 FAT4       | -1.628145218 |
| PRR11 | -2.190246524 PRR11      | -1.885977691 |
| MPP4  | -3.521935606 MPP4       | -1.544849693 |



|       |                    |              |
|-------|--------------------|--------------|
| RBM39 | -1.718569797 RBM39 | -1.629745828 |
| FRMD3 | -5.076197098 FRMD3 | -3.660192791 |
| GULP1 | -2.582613431 GULP1 | -1.558498364 |
| POSTN | -2.895159966 POSTN | -1.506393198 |
| SMC4  | -2.763530635 SMC4  | -1.623316968 |
